# Supplementary material for: Network pharmacology evaluation of the active ingredients and potential targets of XiaoLuoWan for application to uterine fibroids
Source: PubMed Central journal article supplement (PMC7724689; doi:10.1042/bsr20202342), 2020-12-04
Supplement: BSR-2020-2342_supp.pdf [file BSR-2020-2342_supp.pdf]

**Table S1 Detailed information about active ingredients in XLW**

| <b>XLW</b> | <b>Molecule ID</b> | <b>Molecule Name</b>               | <b>MW</b> | <b>OB (%)</b> | <b>Caco-2</b> | <b>DL</b> |
|------------|--------------------|------------------------------------|-----------|---------------|---------------|-----------|
| Xuanshen   | MOL000114          | vanillic acid                      | 168.16    | 35.47         | 0.43          | 0.04      |
| Xuanshen   | MOL001301          | cis-Zimtsaeure                     | 148.17    | 38.19         | 0.91          | 0.03      |
| Xuanshen   | MOL000141          | hydroxytyrosol                     | 154.18    | 57.57         | 0.3           | 0.03      |
| Xuanshen   | MOL003333          | acteoside                          | 624.65    | 2.94          | -1.89         | 0.62      |
| Xuanshen   | MOL000156          | decaffeoylacteoside                | 462.5     | 6.33          | -1.88         | 0.63      |
| Xuanshen   | MOL001660          | p-MCA                              | 178.2     | 31            | 0.75          | 0.05      |
| Xuanshen   | MOL001925          | paeoniflorin_qt                    | 318.35    | 68.18         | -0.34         | 0.4       |
| Xuanshen   | MOL002222          | sugiol                             | 300.48    | 36.11         | 1.14          | 0.28      |
| Xuanshen   | MOL000223          | caffeic acid                       | 180.17    | 25.76         | 0.21          | 0.05      |
| Xuanshen   | MOL002295          | cinnamic acid                      | 148.17    | 19.68         | 0.91          | 0.03      |
| Xuanshen   | MOL002820          | catapol_qt                         | 200.21    | 44.69         | -0.63         | 0.1       |
| Xuanshen   | MOL002922          | 5-(2-hydroxyethyl)-2-methoxyphenol | 168.21    | 31.95         | 0.6           | 0.04      |
| Xuanshen   | MOL000346          | succinic acid                      | 118.1     | 29.62         | -0.44         | 0.01      |
| Xuanshen   | MOL000356          | lupeol                             | 426.8     | 12.12         | 1.46          | 0.78      |
| Xuanshen   | MOL000357          | Sitogluside                        | 576.95    | 20.63         | -0.14         | 0.62      |

|          |           |                                     |        |        |       |      |
|----------|-----------|-------------------------------------|--------|--------|-------|------|
| Xuanshen | MOL000358 | beta-sitosterol                     | 414.79 | 36.91  | 1.32  | 0.75 |
| Xuanshen | MOL000359 | sitosterol                          | 414.79 | 36.91  | 1.32  | 0.75 |
| Xuanshen | MOL000360 | FER                                 | 194.2  | 39.56  | 0.47  | 0.06 |
| Xuanshen | MOL003735 | aucubin                             | 346.37 | 4.17   | -1.83 | 0.33 |
| Xuanshen | MOL000389 | FERULIC ACID (CIS)                  | 194.2  | 54.97  | 0.53  | 0.06 |
| Xuanshen | MOL000429 | Crystal VI                          | 132.14 | 83.96  | -0.88 | 0.02 |
| Xuanshen | MOL000511 | ursolic acid                        | 456.78 | 16.77  | 0.67  | 0.75 |
| Xuanshen | MOL006670 | aucubigenin                         | 184.21 | 101.77 | -0.84 | 0.06 |
| Xuanshen | MOL000675 | oleic acid                          | 282.52 | 33.13  | 1.17  | 0.14 |
| Xuanshen | MOL007002 | paeoniflorin                        | 480.51 | 10.22  | -1.69 | 0.79 |
| Xuanshen | MOL007272 | Homovanillyl alcohol                | 168.21 | 38.2   | 0.49  | 0.04 |
| Xuanshen | MOL000748 | HMF                                 | 126.12 | 45.07  | 0.05  | 0.02 |
| Xuanshen | MOL007655 | angroside C                         | 784.84 | 6.48   | -2.56 | 0.38 |
| Xuanshen | MOL007656 | scropolioside A                     | 752.79 | 13     | -2.24 | 0.35 |
| Xuanshen | MOL007657 | scropolioside A qt                  | 590.63 | 38.63  | -0.99 | 0.77 |
| Xuanshen | MOL007658 | 14-deoxy-12(R)-sulfoandrographolide | 414.57 | 62.57  | -0.38 | 0.42 |
| Xuanshen | MOL007659 | scropolioside D                     | 722.76 | 36.62  | -1.97 | 0.4  |

|          |           |                                  |        |        |       |      |
|----------|-----------|----------------------------------|--------|--------|-------|------|
| Xuanshen | MOL007660 | scropolioside D Qt               | 560.6  | 33.17  | -0.94 | 0.82 |
| Xuanshen | MOL009040 | harpagoside                      | 494.54 | 15.53  | -1.36 | 0.83 |
| Xuanshen | MOL007662 | harpagoside Qt                   | 332.38 | 122.87 | -0.17 | 0.32 |
| Xuanshen | MOL007663 | catapol                          | 362.37 | 3.96   | -1.83 | 0.44 |
| Xuanshen | MOL004557 | geniposide                       | 388.41 | 14.64  | -1.7  | 0.44 |
| Xuanshen | MOL007665 | geniposide Qt                    | 226.25 | 4.58   | -0.42 | 0.1  |
| Xuanshen | MOL007666 | 5-(methylthio)valeronitrile      | 129.25 | 66.32  | 1.47  | 0.01 |
| Xuanshen | MOL007667 | 6'-O-cinnamoylharpagirle         | 492.57 | 13.06  | -1.26 | 0.82 |
| Xuanshen | MOL007668 | 6'-O-cinnamoylharpagirle Qt 2    | 200.26 | 27.75  | -0.5  | 0.08 |
| Xuanshen | MOL007669 | 6-O-methylcatapol                | 376.4  | 5.8    | -1.29 | 0.48 |
| Xuanshen | MOL007670 | 6-O-methylcatapol Qt             | 214.24 | 60.28  | -0.04 | 0.11 |
| Xuanshen | MOL007671 | harpagide                        | 364.39 | 9.76   | -2.13 | 0.36 |
| Xuanshen | MOL007672 | 7-hydroxy-9-hydroxymethyl-3-oxo- | 182.24 | 44.49  | -0.54 | 0.06 |
| Xuanshen | MOL007673 | cistanoside D                    | 652.71 | 12.91  | -1.59 | 0.59 |
| Xuanshen | MOL000875 | Cedrol                           | 222.41 | 16.23  | 1.35  | 0.12 |
| Zhebeimu | MOL001004 | pelargonidin                     | 271.26 | 37.99  | 0.31  | 0.21 |
| Zhebeimu | MOL003171 | 2,5-Dimethoxybenzoquinone        | 168.16 | 8.72   | 0.47  | 0.04 |

|           |                |                                                                               |         |       |       |      |
|-----------|----------------|-------------------------------------------------------------------------------|---------|-------|-------|------|
| Zhebeimu  | MOL000358      | beta-sitosterol                                                               | 414.79  | 36.91 | 1.32  | 0.75 |
| Zhebeimu  | MOL000365      | syringaresinol                                                                | 418.48  | 3.29  | 0.6   | 0.72 |
| Zhebeimu  | MOL004440      | Peimisine                                                                     | 427.69  | 57.4  | 0.18  | 0.81 |
| Zhebeimu  | MOL004442      | Pelargonidin-3,5-diglucoside                                                  | 595.58  | 10.96 | -2.87 | 0.76 |
| Zhebeimu  | MOL004443      | Zhebeiresinol                                                                 | 280.3   | 58.72 | 0.53  | 0.19 |
| Zhebeimu  | MOL004444      | Ziebeimine                                                                    | 413.71  | 64.25 | 0.81  | 0.7  |
| Zhebeimu  | MOL004445      | Verticine                                                                     | 431.73  | 17.42 | 0.05  | 0.67 |
| Zhebeimu  | MOL004446      | 6-Methoxyl-2-acetyl-3-methyl-1,4-naphthoquinone-8-O-beta-D-glucopyranoside    | 422.42  | 33.31 | -1.21 | 0.57 |
| Zhebeimu  | MOL004447      | 6-Methoxyl-2-acetyl-3-methyl-1,4-naphthoquinone-8-O-beta-D-glucopyranoside Qt | 260.26  | 19.87 | 0.1   | 0.15 |
| Zhebeimu  | MOL004448      | Solatubin                                                                     | 397.71  | 17.12 | 1.22  | 0.76 |
| Zhebeimu  | MOL004449      | OSI-2040                                                                      | 623.88  | 14.65 | 0.13  | 0.61 |
| Zhebeimu  | MOL004450      | Chaksine                                                                      | 450.66  | 65.63 | -0.01 | 0.66 |
| Zhebeimu  | MOL004451      | Peiminine                                                                     | 429.71  | 13.2  | 0.23  | 0.67 |
| Zhebeimu  | MOL004452      | Peimoside                                                                     | 593.89  | 2.25  | -1.14 | 0.21 |
| Zhebeimu  | MOL004453      | Peimoside Qt                                                                  | 431.73  | 11.75 | 0.18  | 0.67 |
| Shengmuli | tcmid_ID:23782 | Aluminum                                                                      | 26.982  | —     | —     | —    |
| Shengmuli | tcmid_ID:23648 | Calcium Sulphate                                                              | 136.141 | —     | —     | —    |

|           |                |                   |         |   |   |   |
|-----------|----------------|-------------------|---------|---|---|---|
| Shengmuli | tcmid_ID:25060 | Calcium Phosphate | 310.177 | — | — | — |
| Shengmuli | tcmid_ID:23471 | Silicon           | 28.086  | — | — | — |
| Shengmuli | tcmid_ID:23378 | Calcium Carbonate | 100.087 | — | — | — |

**Table S2 Detailed information about putative gene targets in XLW**

| <b>XLW</b> | <b>Compound</b> | <b>Target Genes</b> | <b>Gene ID in UniProt</b> |
|------------|-----------------|---------------------|---------------------------|
| Xuanshen   | sugiol          | CHRM3               | P20309                    |
| Xuanshen   | sugiol          | CHRM1               | P11229                    |
| Xuanshen   | sugiol          | SCN5A               | Q14524                    |
| Xuanshen   | sugiol          | CHRM5               | P08912                    |
| Xuanshen   | sugiol          | PTGS2               | P35354                    |
| Xuanshen   | sugiol          | CA2                 | P00918                    |
| Xuanshen   | sugiol          | CHRM4               | P08173                    |
| Xuanshen   | sugiol          | OPRD1               | P41143                    |
| Xuanshen   | sugiol          | ACHE                | P22303                    |
| Xuanshen   | sugiol          | ADRA1A              | P35348                    |
| Xuanshen   | sugiol          | CHRM2               | P08172                    |
| Xuanshen   | sugiol          | ADRA1B              | P35368                    |
| Xuanshen   | sugiol          | ADRB2               | P07550                    |
| Xuanshen   | sugiol          | ADRA1D              | P25100                    |
| Xuanshen   | sugiol          | DRD2                | P14416                    |
| Xuanshen   | sugiol          | OPRM1               | P35372                    |
| Xuanshen   | sugiol          | CHRNA7              | P36544                    |
| Xuanshen   | beta-sitosterol | PGR                 | P06401                    |
| Xuanshen   | beta-sitosterol | NCOA2               | Q15596                    |
| Xuanshen   | beta-sitosterol | PTGS1               | P23219                    |
| Xuanshen   | beta-sitosterol | PTGS2               | P35354                    |
| Xuanshen   | beta-sitosterol | HSP90AB1            | P08238                    |
| Xuanshen   | beta-sitosterol | PIK3CG              | P48736                    |
| Xuanshen   | beta-sitosterol | KCNH2               | Q12809                    |
| Xuanshen   | beta-sitosterol | PRKACA              | P17612                    |
| Xuanshen   | beta-sitosterol | DRD1                | P21728                    |
| Xuanshen   | beta-sitosterol | CHRM3               | P20309                    |
| Xuanshen   | beta-sitosterol | CHRM1               | P11229                    |
| Xuanshen   | beta-sitosterol | SCN5A               | Q14524                    |
| Xuanshen   | beta-sitosterol | GABRA2              | P47869                    |
| Xuanshen   | beta-sitosterol | CHRM4               | P08173                    |
| Xuanshen   | beta-sitosterol | PDE3A               | Q14432                    |
| Xuanshen   | beta-sitosterol | HTR2A               | P28223                    |
| Xuanshen   | beta-sitosterol | GABRA5              | P31644                    |
| Xuanshen   | beta-sitosterol | ADRA1A              | P35348                    |
| Xuanshen   | beta-sitosterol | GABRA3              | P34903                    |
| Xuanshen   | beta-sitosterol | CHRM2               | P08172                    |

|          |                 |          |        |
|----------|-----------------|----------|--------|
| Xuanshen | beta-sitosterol | ADRA1B   | P35368 |
| Xuanshen | beta-sitosterol | ADRB2    | P07550 |
| Xuanshen | beta-sitosterol | CHRNA2   | Q15822 |
| Xuanshen | beta-sitosterol | SLC6A4   | P31645 |
| Xuanshen | beta-sitosterol | OPRM1    | P35372 |
| Xuanshen | beta-sitosterol | GABRA1   | P14867 |
| Xuanshen | beta-sitosterol | CHRNA7   | P36544 |
| Xuanshen | beta-sitosterol | CYP101A1 | P00183 |
| Xuanshen | beta-sitosterol | BCL2     | P10415 |
| Xuanshen | beta-sitosterol | BAX      | Q07812 |
| Xuanshen | beta-sitosterol | CASP9    | P55211 |
| Xuanshen | beta-sitosterol | JUN      | P05412 |
| Xuanshen | beta-sitosterol | CASP3    | P42574 |
| Xuanshen | beta-sitosterol | CASP8    | Q14790 |
| Xuanshen | beta-sitosterol | PRKCA    | P17252 |
| Xuanshen | beta-sitosterol | TGFB1    | P01137 |
| Xuanshen | beta-sitosterol | PON1     | P27169 |
| Xuanshen | beta-sitosterol | MAP2     | P11137 |
| Xuanshen | sitosterol      | PGR      | P06401 |
| Xuanshen | sitosterol      | NCOA2    | Q15596 |
| Xuanshen | sitosterol      | NR3C2    | P08235 |
| Zhebeimu | beta-sitosterol | PGR      | P06401 |
| Zhebeimu | beta-sitosterol | NCOA2    | Q15596 |
| Zhebeimu | beta-sitosterol | PTGS1    | P23219 |
| Zhebeimu | beta-sitosterol | PTGS2    | P35354 |
| Zhebeimu | beta-sitosterol | HSP90AB1 | P08238 |
| Zhebeimu | beta-sitosterol | PIK3CG   | P48736 |
| Zhebeimu | beta-sitosterol | KCNH2    | Q12809 |
| Zhebeimu | beta-sitosterol | PRKACA   | P17612 |
| Zhebeimu | beta-sitosterol | DRD1     | P21728 |
| Zhebeimu | beta-sitosterol | CHRM3    | P20309 |
| Zhebeimu | beta-sitosterol | CHRM1    | P11229 |
| Zhebeimu | beta-sitosterol | SCN5A    | Q14524 |
| Zhebeimu | beta-sitosterol | GABRA2   | P47869 |
| Zhebeimu | beta-sitosterol | CHRM4    | P08173 |
| Zhebeimu | beta-sitosterol | PDE3A    | Q14432 |
| Zhebeimu | beta-sitosterol | HTR2A    | P28223 |
| Zhebeimu | beta-sitosterol | GABRA5   | P31644 |
| Zhebeimu | beta-sitosterol | ADRA1A   | P35348 |
| Zhebeimu | beta-sitosterol | GABRA3   | P34903 |

|           |                  |          |        |
|-----------|------------------|----------|--------|
| Zhebeimu  | beta-sitosterol  | CHRM2    | P08172 |
| Zhebeimu  | beta-sitosterol  | ADRA1B   | P35368 |
| Zhebeimu  | beta-sitosterol  | ADRB2    | P07550 |
| Zhebeimu  | beta-sitosterol  | CHRNA2   | Q15822 |
| Zhebeimu  | beta-sitosterol  | SLC6A4   | P31645 |
| Zhebeimu  | beta-sitosterol  | OPRM1    | P35372 |
| Zhebeimu  | beta-sitosterol  | GABRA1   | P14867 |
| Zhebeimu  | beta-sitosterol  | CHRNA7   | P36544 |
| Zhebeimu  | beta-sitosterol  | CYP101A1 | P00183 |
| Zhebeimu  | beta-sitosterol  | BCL2     | P10415 |
| Zhebeimu  | beta-sitosterol  | BAX      | Q07812 |
| Zhebeimu  | beta-sitosterol  | CASP9    | P55211 |
| Zhebeimu  | beta-sitosterol  | JUN      | P05412 |
| Zhebeimu  | beta-sitosterol  | CASP3    | P42574 |
| Zhebeimu  | beta-sitosterol  | CASP8    | Q14790 |
| Zhebeimu  | beta-sitosterol  | PRKCA    | P17252 |
| Zhebeimu  | beta-sitosterol  | TGFB1    | P01137 |
| Zhebeimu  | beta-sitosterol  | PON1     | P27169 |
| Zhebeimu  | beta-sitosterol  | MAP2     | P11137 |
| Zhebeimu  | Zhebeiresinol    | PTGS1    | P23219 |
| Zhebeimu  | Zhebeiresinol    | SCN5A    | Q14524 |
| Zhebeimu  | Zhebeiresinol    | PTGS2    | P35354 |
| Zhebeimu  | Zhebeiresinol    | RXRA     | P19793 |
| Zhebeimu  | Zhebeiresinol    | PDE3A    | Q14432 |
| Zhebeimu  | Zhebeiresinol    | ADRB2    | P07550 |
| Zhebeimu  | Zhebeiresinol    | GABRA1   | P14867 |
| Zhebeimu  | Zhebeiresinol    | HSP90AB1 | P08238 |
| Shengmuli | Aluminum         | TF       | P02787 |
| Shengmuli | Aluminum         | ATP1A1   | P05023 |
| Shengmuli | Calcium Sulphate | CACNB1   | Q02641 |
| Shengmuli | Calcium Sulphate | CACNA2D1 | P54289 |
| Shengmuli | Calcium Sulphate | CACNA1S  | Q13698 |
| Shengmuli | Calcium Sulphate | CACNA1C  | Q13936 |
| Shengmuli | Calcium Sulphate | CACNB2   | Q08289 |
| Shengmuli | Calcium Sulphate | CACNG1   | Q06432 |
| Shengmuli | Calcium Sulphate | FOXL2    | P58012 |
| Shengmuli | Calcium Sulphate | DMTN     | Q08495 |
| Shengmuli | Calcium Sulphate | KCNMA1   | Q12791 |
| Shengmuli | Calcium Sulphate | P2RX2    | Q9UBL9 |
| Shengmuli | Calcium Sulphate | HTR2A    | P28223 |



|           |                   |          |        |
|-----------|-------------------|----------|--------|
| Shengmuli | Calcium Sulphate  | P2RX3    | P56373 |
| Shengmuli | Calcium Sulphate  | CHRNA3   | P32297 |
| Shengmuli | Calcium Sulphate  | CHRNB2   | P17787 |
| Shengmuli | Calcium Sulphate  | CHRNB4   | P30926 |
| Shengmuli | Calcium Phosphate | CACNB1   | Q02641 |
| Shengmuli | Calcium Phosphate | CACNA2D1 | P54289 |
| Shengmuli | Calcium Phosphate | SLC12A2  | P55011 |
| Shengmuli | Calcium Phosphate | SLC12A7  | Q9Y666 |
| Shengmuli | Calcium Phosphate | SLC12A5  | Q9H2X9 |
| Shengmuli | Calcium Phosphate | CACNA1S  | Q13698 |
| Shengmuli | Calcium Phosphate | CACNA1C  | Q13936 |
| Shengmuli | Calcium Phosphate | SLC12A6  | Q9UHW9 |
| Shengmuli | Calcium Phosphate | SLC12A1  | Q13621 |
| Shengmuli | Calcium Phosphate | CACNB2   | Q08289 |
| Shengmuli | Calcium Phosphate | SLC12A4  | Q9UP95 |
| Shengmuli | Calcium Phosphate | CACNG1   | Q06432 |
| Shengmuli | Silicon           | ADRA1A   | P35348 |
| Shengmuli | Silicon           | SLC18A2  | Q05940 |
| Shengmuli | Silicon           | HTR1A    | P08908 |
| Shengmuli | Calcium Carbonate | FDPS     | P14324 |

**Table S3 Identified known therapeutic gene targets about UFs in DiGSeE database**

| PubMed ID | Gene    | Event class     | Event term  | Searched disease  | Evidence score |
|-----------|---------|-----------------|-------------|-------------------|----------------|
| 12821352  | DNMT1   | Gene expression | expression  | leiomyoma uterine | 0.825          |
| 12193211  | GFAP    | Gene expression | expression  | leiomyoma uterine | 0.821          |
| 16109840  | CYP19A1 | Binding         | binding     | leiomyoma uterine | 0.804          |
| 10550310  | HMGA2   | Gene expression | expressed   | leiomyoma uterine | 0.799          |
| 15196440  | PCNA    | Gene expression | expression  | leiomyoma uterine | 0.784          |
| 12149410  | ESR1    | Gene expression | expressing  | leiomyoma uterine | 0.777          |
| 9159329   | PCNA    | Gene expression | expression  | leiomyoma uterine | 0.777          |
| 9263424   | TMPO    | Gene expression | expression  | leiomyoma uterine | 0.766          |
| 12065682  | MYOZ2   | Gene expression | expressed   | leiomyoma uterine | 0.766          |
| 10671823  | NOS3    | Gene expression | expression  | leiomyoma uterine | 0.762          |
| 10825369  | PCNA    | Gene expression | expression  | leiomyoma uterine | 0.761          |
| 10854234  | CDKN2A  | Gene expression | Expression  | leiomyoma uterine | 0.754          |
| 15051039  | BCL2    | Gene expression | expression  | leiomyoma uterine | 0.745          |
| 10611261  | FOS     | Gene expression | expression  | leiomyoma uterine | 0.742          |
| 16730007  | COMT    | Gene expression | expression  | leiomyoma uterine | 0.736          |
| 1516585   | KRAS    | Gene expression | expression  | leiomyoma uterine | 0.735          |
| 17001917  | MME     | Gene expression | expressed   | leiomyoma uterine | 0.733          |
| 16973256  | TP53    | Gene expression | expression  | leiomyoma uterine | 0.733          |
| 12920818  | SLC4A1  | Gene expression | expression  | leiomyoma uterine | 0.73           |
| 2208134   | IGF2    | Gene expression | expressed   | leiomyoma uterine | 0.73           |
| 10202672  | INHA    | Gene expression | expression  | leiomyoma uterine | 0.729          |
| 10967169  | NOS3    | Gene expression | expression  | leiomyoma uterine | 0.728          |
| 12920806  | EGFR    | Gene expression | expressions | leiomyoma uterine | 0.728          |
| 12133359  | KIT     | Gene expression | expression  | leiomyoma uterine | 0.727          |
| 15139000  | DPT     | Gene expression | expression  | leiomyoma uterine | 0.726          |
| 15051038  | MMP2    | Gene expression | expression  | leiomyoma uterine | 0.723          |
| 10230352  | LGALS3  | Gene expression | expression  | leiomyoma uterine | 0.722          |
| 7775635   | ESR1    | Gene expression | expression  | leiomyoma uterine | 0.72           |
| 11957148  | PDAP1   | Gene expression | expression  | leiomyoma uterine | 0.718          |
| 10956556  | ADRB2   | Gene expression | expression  | leiomyoma uterine | 0.718          |
| 10682457  | EGF     | Gene expression | expression  | leiomyoma uterine | 0.717          |
| 10830768  | TP53    | Gene expression | expression  | leiomyoma uterine | 0.711          |
| 12097287  | TSC2    | Gene expression | expression  | leiomyoma uterine | 0.71           |

|          |         |                 |               |                   |       |
|----------|---------|-----------------|---------------|-------------------|-------|
| 10426571 | PTHLH   | Gene expression | expression    | leiomyoma uterine | 0.71  |
| 17300669 | NES     | Gene expression | expression    | leiomyoma uterine | 0.71  |
| 10394541 | BCL2    | Gene expression | expression    | leiomyoma uterine | 0.709 |
| 10398424 | HMGA2   | Gene expression | expression    | leiomyoma uterine | 0.708 |
| 12874903 | DES     | Gene expression | expression    | leiomyoma uterine | 0.706 |
| 14981145 | WISP2   | Gene expression | expression    | leiomyoma uterine | 0.705 |
| 10545803 | PCNA    | Gene expression | expression    | leiomyoma uterine | 0.704 |
| 10698042 | IGFBP7  | Gene expression | expression    | leiomyoma uterine | 0.704 |
| 16146740 | CYP19A1 | Gene expression | expression    | leiomyoma uterine | 0.704 |
| 12111198 | RBP1    | Gene expression | expression    | leiomyoma uterine | 0.703 |
| 10682471 | PGR     | Gene expression | expression    | leiomyoma uterine | 0.703 |
| 16697947 | TGFB3   | Gene expression | expression    | leiomyoma uterine | 0.703 |
| 9216720  | HMGA2   | Gene expression | expression    | leiomyoma uterine | 0.702 |
| 17341559 | CYP19A1 | Gene expression | expression    | leiomyoma uterine | 0.702 |
| 1333524  | TP53    | Gene expression | expression    | leiomyoma uterine | 0.7   |
| 17332316 | HMGA2   | Gene expression | expressed     | leiomyoma uterine | 0.698 |
| 2670616  | VIM     | Gene expression | expression    | leiomyoma uterine | 0.698 |
| 17173903 | PTN     | Gene expression | expressed     | leiomyoma uterine | 0.692 |
| 10086344 | KIT     | Gene expression | expression    | leiomyoma uterine | 0.691 |
| 15059325 | KIT     | Gene expression | expression    | leiomyoma uterine | 0.689 |
| 10362815 | COL4A5  | Transcription   | transcription | leiomyoma uterine | 0.688 |
| 10850463 | VIPR2   | Gene expression | express       | leiomyoma uterine | 0.687 |
| 15322223 | S100A11 | Gene expression | expression    | leiomyoma uterine | 0.68  |
| 10371341 | CDK2    | Gene expression | expression    | leiomyoma uterine | 0.678 |
| 10559661 | CYP19A1 | Gene expression | expressed     | leiomyoma uterine | 0.673 |
| 12111201 | BAX     | Gene expression | expression    | leiomyoma uterine | 0.673 |
| 15231681 | EGR1    | Gene expression | expression    | leiomyoma uterine | 0.672 |
| 9290461  | PCNA    | Gene expression | expression    | leiomyoma uterine | 0.671 |
| 11193811 | VIPR2   | Gene expression | express       | leiomyoma uterine | 0.668 |
| 10601839 | AR      | Gene expression | expression    | leiomyoma uterine | 0.668 |
| 19729795 | ESR1    | Mutation        | T/C           | leiomyoma uterine | 0.653 |
| 10208423 | LTA     | Gene expression | expressing    | leiomyoma uterine | 0.651 |
| 10914728 | VEGFA   | Gene expression | expressed     | leiomyoma uterine | 0.65  |
| 10785229 | TGFB3   | Gene expression | expression    | leiomyoma uterine | 0.648 |
| 15066464 | ESR1    | Gene expression | expression    | leiomyoma uterine | 0.646 |
| 11867266 | BCL2    | Gene expression | expression    | leiomyoma uterine | 0.644 |

|          |         |                 |               |                   |       |
|----------|---------|-----------------|---------------|-------------------|-------|
| 9253340  | FOS     | Gene expression | expression    | leiomyoma uterine | 0.639 |
| 17316415 | KIT     | Gene expression | expressing    | leiomyoma uterine | 0.639 |
| 10508223 | LCN2    | Gene expression | expression    | leiomyoma uterine | 0.631 |
| 12909487 | FZD2    | Gene expression | expression    | leiomyoma uterine | 0.631 |
| 11870232 | ZKSCAN7 | Gene expression | expression    | leiomyoma uterine | 0.626 |
| 10450179 | LCN2    | Gene expression | expression    | leiomyoma uterine | 0.618 |
| 17276435 | TFPI    | Gene expression | expression    | leiomyoma uterine | 0.617 |
| 15193492 | CD36    | Gene expression | expression    | leiomyoma uterine | 0.614 |
| 19639498 | ESR2    | Mutation        | rs3020450     | leiomyoma uterine | 0.593 |
| 25792652 | PON1    | Mutation        | Q192R         | leiomyoma uterine | 0.593 |
| 15033949 | ESR1    | Gene expression | expression    | leiomyoma uterine | 0.59  |
| 16681772 | TP53    | Gene expression | expressed     | leiomyoma uterine | 0.589 |
| 18182398 | CCND1   | Mutation        | G870A         | leiomyoma uterine | 0.584 |
| 20013148 | XRCC1   | Mutation        | Arg280His     | leiomyoma uterine | 0.584 |
| 26261478 | HSD17B1 | Mutation        | rs605059      | leiomyoma uterine | 0.584 |
| 26064254 | CYP1A1  | Mutation        | Ile462Val     | leiomyoma uterine | 0.584 |
| 9294852  | FGFR1   | Gene expression | expression    | leiomyoma uterine | 0.582 |
| 10352391 | PRL     | Gene expression | production    | leiomyoma uterine | 0.581 |
| 17296196 | GNRH2   | Gene expression | expression    | leiomyoma uterine | 0.581 |
| 12201218 | PTH     | Gene expression | expressed     | leiomyoma uterine | 0.574 |
| 17268837 | KIT     | Gene expression | expressed     | leiomyoma uterine | 0.574 |
| 26254358 | XRCC3   | Mutation        | rs45603942    | leiomyoma uterine | 0.573 |
| 17170071 | CRABP2  | Transcription   | transcription | leiomyoma uterine | 0.573 |
| 11872215 | OVGP1   | Gene expression | expression    | leiomyoma uterine | 0.571 |
| 17336977 | CYP19A1 | Gene expression | expression    | leiomyoma uterine | 0.567 |
| 11201279 | AKR1C4  | Gene expression | expression    | leiomyoma uterine | 0.561 |
| 26113603 | RGS7    | Mutation        | rs78220092    | leiomyoma uterine | 0.558 |
| 17636223 | COMT    | Mutation        | Val158Met     | leiomyoma uterine | 0.558 |
| 16638593 | MMP1    | Mutation        | -1562 C/T     | leiomyoma uterine | 0.558 |
| 10633228 | GJA1    | Gene expression | Expression    | leiomyoma uterine | 0.558 |
| 1309926  | PDGFRB  | Gene expression | expression    | leiomyoma uterine | 0.556 |
| 15860490 | VEGFA   | Gene expression | expression    | leiomyoma uterine | 0.552 |
| 1310202  | HTLVR   | Binding         | binding       | leiomyoma uterine | 0.549 |
| 17908262 | FH      | Mutation        | R58P          | leiomyoma uterine | 0.547 |
| 12620485 | CYP19A1 | Gene expression | expression    | leiomyoma uterine | 0.545 |
| 20427420 | TSHR    | Mutation        | M453T         | leiomyoma uterine | 0.54  |

|          |          |                     |                         |                   |       |
|----------|----------|---------------------|-------------------------|-------------------|-------|
| 17220163 | PCNA     | Gene expression     | expression              | leiomyoma uterine | 0.54  |
| 10027613 | OXT      | Localization        | localization            | leiomyoma uterine | 0.54  |
| 16160478 | ALK      | Gene expression     | expression              | leiomyoma uterine | 0.538 |
| 10860276 | PGR      | Gene expression     | expression              | leiomyoma uterine | 0.535 |
| 15663510 | FH       | Mutation            | substitution at nucleoc | leiomyoma uterine | 0.535 |
| 17186536 | TP53     | Gene expression     | expression              | leiomyoma uterine | 0.532 |
| 16962107 | BCL2     | Gene expression     | expression              | leiomyoma uterine | 0.532 |
| 15949892 | FH       | Gene expression     | expression              | leiomyoma uterine | 0.532 |
| 18164802 | CASP3    | Gene expression     | expression              | leiomyoma uterine | 0.517 |
| 12922981 | MYC      | Gene expression     | expression              | leiomyoma uterine | 0.516 |
| 2112150  | PRL      | Localization        | secretion               | leiomyoma uterine | 0.515 |
| 2768133  | DES      | Gene expression     | expression              | leiomyoma uterine | 0.514 |
| 16935316 | ESR1     | Mutation            | rs17847075              | leiomyoma uterine | 0.512 |
| 17011556 | ESR2     | Localization        | localization            | leiomyoma uterine | 0.511 |
| 16778173 | RAD51B   | Gene expression     | expression              | leiomyoma uterine | 0.507 |
| 10029085 | PLAG1    | Gene expression     | expression              | leiomyoma uterine | 0.507 |
| 12090595 | DES      | Gene expression     | expression              | leiomyoma uterine | 0.503 |
| 17164439 | SPHK1    | Positive regulation | increased               | leiomyoma uterine | 0.501 |
| 15228428 | CCND1    | Gene expression     | expression              | leiomyoma uterine | 0.491 |
| 10611187 | PGR      | Gene expression     | expression              | leiomyoma uterine | 0.486 |
| 10620447 | ESR1     | Transcription       | transcription           | leiomyoma uterine | 0.483 |
| 14561812 | GAS6     | Gene expression     | expression              | leiomyoma uterine | 0.478 |
| 15032287 | CDH1     | Gene expression     | expression              | leiomyoma uterine | 0.477 |
| 17976709 | GNRH1    | Localization        | Releasing               | leiomyoma uterine | 0.476 |
| 17278201 | DES      | Gene expression     | expression              | leiomyoma uterine | 0.474 |
| 16959847 | SPHK1    | Gene expression     | expression              | leiomyoma uterine | 0.472 |
| 15164305 | ESR1     | Binding             | bind                    | leiomyoma uterine | 0.466 |
| 2797644  | IGF1R    | Binding             | binding                 | leiomyoma uterine | 0.466 |
| 17021135 | KIT      | Gene expression     | expressed               | leiomyoma uterine | 0.457 |
| 18231572 | SHC1     | Transcription       | overexpressed           | leiomyoma uterine | 0.452 |
| 21143902 | SELENBP1 | Gene expression     | expression              | leiomyoma uterine | 0.452 |
| 12624519 | ERBB2    | Gene expression     | expression              | leiomyoma uterine | 0.447 |
| 2116610  | IGF2     | Localization        | secretion               | leiomyoma uterine | 0.446 |
| 19715484 | ESR2     | Mutation            | rs1256049               | leiomyoma uterine | 0.446 |
| 16595228 | COMT     | Mutation            | A 34T-->C               | leiomyoma uterine | 0.446 |
| 15285309 | ESR1     | Gene expression     | expression              | leiomyoma uterine | 0.443 |

|          |         |                     |                       |                   |       |
|----------|---------|---------------------|-----------------------|-------------------|-------|
| 17407572 | ANXA1   | Gene expression     | expression            | leiomyoma uterine | 0.44  |
| 22546946 | HSD17B1 | Mutation            | rs605059              | leiomyoma uterine | 0.437 |
| 20559649 | CYP1B1  | Mutation            | Leu 432Val            | leiomyoma uterine | 0.437 |
| 18763031 | CYP1A1  | Mutation            | Ile462Val             | leiomyoma uterine | 0.437 |
| 23238870 | COMT    | Mutation            | Val158Met             | leiomyoma uterine | 0.437 |
| 25511444 | MDM2    | Mutation            | T309G                 | leiomyoma uterine | 0.437 |
| 26692154 | TP53    | Mutation            | Arg72Pro              | leiomyoma uterine | 0.437 |
| 16051682 | PPARG   | Positive regulation | roliferation-activate | leiomyoma uterine | 0.436 |
| 17343855 | CCL2    | Gene expression     | production            | leiomyoma uterine | 0.434 |
| 15604208 | CDKN1C  | Gene expression     | expression            | leiomyoma uterine | 0.431 |
| 10566662 | BMP6    | Gene expression     | express               | leiomyoma uterine | 0.426 |
| 12095500 | MAP3K12 | Gene expression     | expressed             | leiomyoma uterine | 0.423 |
| 9299534  | PRL     | Gene expression     | expression            | leiomyoma uterine | 0.42  |
| 9159347  | MDM2    | Gene expression     | overexpression        | leiomyoma uterine | 0.416 |
| 11869553 | CCND1   | Gene expression     | Overexpression        | leiomyoma uterine | 0.413 |
| 21138652 | IL4     | Mutation            | -590 C/T              | leiomyoma uterine | 0.411 |
| 26075073 | CYP1B1  | Mutation            | rs1800440             | leiomyoma uterine | 0.411 |
| 24777039 | CYP1A1  | Mutation            | Ala119Ser             | leiomyoma uterine | 0.408 |
| 16972175 | AKR1B10 | Mutation            | c.976C > T            | leiomyoma uterine | 0.408 |
| 9157826  | VIM     | Gene expression     | coexpression          | leiomyoma uterine | 0.407 |
| 11938733 | ESR1    | Gene expression     | expression            | leiomyoma uterine | 0.406 |
| 2778330  | TGFB1   | Positive regulation | increased             | leiomyoma uterine | 0.406 |
| 18569028 | ATP8A2  | Gene expression     | expression            | leiomyoma uterine | 0.404 |
| 17313836 | PML     | Gene expression     | expression            | leiomyoma uterine | 0.4   |
| 18601603 | CYP17A1 | Mutation            | rs743572              | leiomyoma uterine | 0.399 |
| 19614627 | IL1B    | Mutation            | -511 C<T              | leiomyoma uterine | 0.399 |
| 26417400 | SORCS2  | Mutation            | rs2285789             | leiomyoma uterine | 0.399 |
| 26482777 | CYP1B1  | Mutation            | Leu432Val             | leiomyoma uterine | 0.399 |
| 26704829 | MME     | Mutation            | P504S                 | leiomyoma uterine | 0.399 |
| 18580309 | MKI67   | Gene expression     | expression            | leiomyoma uterine | 0.392 |
| 10784614 | ZNF382  | Binding             | bound                 | leiomyoma uterine | 0.388 |
| 10774817 | PGR     | Gene expression     | expression            | leiomyoma uterine | 0.385 |
| 15589581 | CDKN2A  | Gene expression     | expression            | leiomyoma uterine | 0.383 |
| 12413981 | HOXA10  | Gene expression     | express               | leiomyoma uterine | 0.383 |
| 15086838 | NCAM1   | Gene expression     | expression            | leiomyoma uterine | 0.383 |
| 17036392 | VEGFA   | Gene expression     | Expression            | leiomyoma uterine | 0.383 |

|          |         |                     |                     |                   |       |
|----------|---------|---------------------|---------------------|-------------------|-------|
| 15724016 | FH      | Mutation            | G354R               | leiomyoma uterine | 0.38  |
| 25985877 | FH      | Mutation            | p.(His318Leu)       | leiomyoma uterine | 0.38  |
| 19448595 | PDGFRA  | Mutation            | 1836_1850del        | leiomyoma uterine | 0.38  |
| 16757530 | FH      | Mutation            | N64T                | leiomyoma uterine | 0.38  |
| 18645709 | CYP17A1 | Mutation            | rs1042386           | leiomyoma uterine | 0.374 |
| 17270242 | DES     | Gene expression     | negative            | leiomyoma uterine | 0.37  |
| 26702771 | FBLN1   | Gene expression     | expression          | leiomyoma uterine | 0.362 |
| 17531625 | BCL2    | Gene expression     | expression          | leiomyoma uterine | 0.359 |
| 16720624 | VEGFA   | Positive regulation | progesterone-induce | leiomyoma uterine | 0.348 |
| 10758788 | HESX1   | Localization        | release             | leiomyoma uterine | 0.339 |
| 18956301 | SHBG    | Regulation          | changes             | leiomyoma uterine | 0.336 |
| 23551056 | PDCD6   | Mutation            | rs3756712           | leiomyoma uterine | 0.334 |
| 26396919 | MED12   | Mutation            | c.122-123ins15      | leiomyoma uterine | 0.334 |
| 9495195  | HMGA2   | Gene expression     | overexpressed       | leiomyoma uterine | 0.332 |
| 15536154 | PCNA    | Gene expression     | expression          | leiomyoma uterine | 0.33  |
| 21453057 | ND3     | Mutation            | G3316A              | leiomyoma uterine | 0.329 |
| 23612258 | FH      | Mutation            | .1431_1433dupAA     | leiomyoma uterine | 0.329 |
| 15922007 | IGF1    | Gene expression     | expression          | leiomyoma uterine | 0.328 |
| 10968348 | HESX1   | Localization        | release             | leiomyoma uterine | 0.322 |
| 17380299 | PTGS2   | Regulation          | effect              | leiomyoma uterine | 0.32  |
| 10519970 | EDNRB   | Binding             | binds               | leiomyoma uterine | 0.319 |
| 7882774  | TP53    | Gene expression     | overexpression      | leiomyoma uterine | 0.317 |
| 12937923 | IRS1    | Transcription       | levels              | leiomyoma uterine | 0.316 |
| 10972520 | PLOD1   | Localization        | secretion           | leiomyoma uterine | 0.314 |
| 10680889 | DES     | Gene expression     | coexpression        | leiomyoma uterine | 0.314 |
| 1532397  | MUC16   | Gene expression     | producing           | leiomyoma uterine | 0.309 |
| 26193636 | MED12   | Gene expression     | expression          | leiomyoma uterine | 0.308 |
| 26416628 | PPP4C   | Gene expression     | expression          | leiomyoma uterine | 0.308 |
| 16892079 | HK2     | Positive regulation | induce              | leiomyoma uterine | 0.308 |
| 15941862 | GRPR    | Gene expression     | expression          | leiomyoma uterine | 0.306 |
| 11786376 | IRS1    | Phosphorylation     | phosphorylation     | leiomyoma uterine | 0.305 |
| 10065869 | PSMD9   | Positive regulation | induction           | leiomyoma uterine | 0.304 |
| 15572421 | PCNA    | Gene expression     | expression          | leiomyoma uterine | 0.302 |
| 26261614 | CDKN2A  | Gene expression     | expression          | leiomyoma uterine | 0.3   |
| 10862042 | HMGA2   | Localization        | localized           | leiomyoma uterine | 0.294 |
| 26691377 | CD34    | Gene expression     | expressing          | leiomyoma uterine | 0.289 |

|          |          |                     |                       |                   |       |
|----------|----------|---------------------|-----------------------|-------------------|-------|
| 2112489  | EREG     | Positive regulation | increase              | leiomyoma uterine | 0.28  |
| 14990970 | HVIS     | Gene expression     | using                 | leiomyoma uterine | 0.279 |
| 20171624 | CYP17A1  | Mutation            | rs743572              | leiomyoma uterine | 0.275 |
| 26236334 | TNRC6B   | Mutation            | rs739182              | leiomyoma uterine | 0.275 |
| 22853432 | MMP3     | Mutation            | rs3025058             | leiomyoma uterine | 0.275 |
| 16835796 | PPIG     | Binding             | association           | leiomyoma uterine | 0.273 |
| 1730337  | CGA      | Gene expression     | production            | leiomyoma uterine | 0.272 |
| 15140868 | EGF      | Positive regulation | up-regulates          | leiomyoma uterine | 0.27  |
| 16443508 | COMT     | Mutation            | Val158Met             | leiomyoma uterine | 0.268 |
| 26715264 | PGR      | Mutation            | +331G/A               | leiomyoma uterine | 0.268 |
| 18555241 | MMRN1    | Gene expression     | production            | leiomyoma uterine | 0.265 |
| 18089606 | IGF1     | Gene expression     | expression            | leiomyoma uterine | 0.264 |
| 26405405 | PIP      | Gene expression     | Expression            | leiomyoma uterine | 0.263 |
| 10383698 | TP53     | Gene expression     | overexpression        | leiomyoma uterine | 0.261 |
| 10362625 | EDEM1    | Positive regulation | increased             | leiomyoma uterine | 0.256 |
| 14695314 | FH       | Mutation            | Ala196Thr             | leiomyoma uterine | 0.253 |
| 21506659 | ESR1     | Mutation            | -397T > C             | leiomyoma uterine | 0.253 |
| 23479081 | POLR2E   | Mutation            | rs34917480            | leiomyoma uterine | 0.253 |
| 26383637 | MED12    | Mutation            | L1224F                | leiomyoma uterine | 0.253 |
| 20560959 | FH       | Mutation            | p.Ala274Val           | leiomyoma uterine | 0.253 |
| 12115525 | CUX1     | Positive regulation | increase              | leiomyoma uterine | 0.253 |
| 10764475 | GJA1     | Localization        | localization          | leiomyoma uterine | 0.25  |
| 15355882 | MAPK1    | Positive regulation | activation            | leiomyoma uterine | 0.247 |
| 26552702 | HOXA11   | Gene expression     | expression            | leiomyoma uterine | 0.246 |
| 16330948 | CDKN2A   | Negative regulation | panel                 | leiomyoma uterine | 0.242 |
| 18208801 | ACTC1    | Binding             | immunoreactivity      | leiomyoma uterine | 0.242 |
| 12923133 | SERPINA7 | Regulation          | effect                | leiomyoma uterine | 0.236 |
| 11921278 | HMGA2    | Gene expression     | expression            | leiomyoma uterine | 0.233 |
| 12900513 | COL4A2   | Positive regulation | increased             | leiomyoma uterine | 0.23  |
| 15518168 | CGA      | Gene expression     | present               | leiomyoma uterine | 0.227 |
| 10792849 | FSHR     | Localization        | secretion             | leiomyoma uterine | 0.227 |
| 19088479 | HIF1A    | Gene expression     | expression            | leiomyoma uterine | 0.227 |
| 15979354 | NCOA2    | Gene expression     | expression            | leiomyoma uterine | 0.226 |
| 7902208  | IGF2     | Mutation            | C-->T                 | leiomyoma uterine | 0.225 |
| 10574596 | TP53     | Mutation            | rtate substitution of | leiomyoma uterine | 0.225 |
| 19047911 | TP53     | Mutation            | don 559 (GTT-->GA     | leiomyoma uterine | 0.225 |



|          |        |                     |                |                   |       |
|----------|--------|---------------------|----------------|-------------------|-------|
| 18686281 | PDGFRA | Mutation            | Delta845-848   | leiomyoma uterine | 0.225 |
| 19013437 | ESR1   | Mutation            | T47D           | leiomyoma uterine | 0.225 |
| 17356170 | SGK1   | Mutation            | T47D           | leiomyoma uterine | 0.225 |
| 24684806 | FH     | Mutation            | c.1021G > A    | leiomyoma uterine | 0.225 |
| 22223266 | MED12  | Mutation            | G>A            | leiomyoma uterine | 0.225 |
| 15837988 | GSN    | Mutation            | V559A          | leiomyoma uterine | 0.225 |
| 15761418 | FH     | Mutation            | 905-1G>A       | leiomyoma uterine | 0.225 |
| 16950754 | AR     | Mutation            | R831X          | leiomyoma uterine | 0.225 |
| 16309500 | FH     | Mutation            | T287P          | leiomyoma uterine | 0.225 |
| 15937070 | FH     | Mutation            | R190H          | leiomyoma uterine | 0.225 |
| 14606094 | KIT    | Mutation            | 579ins12       | leiomyoma uterine | 0.225 |
| 12772087 | FH     | Mutation            | R190H          | leiomyoma uterine | 0.225 |
| 22764886 | FH     | Mutation            | c.584T>C       | leiomyoma uterine | 0.225 |
| 17960613 | FH     | Mutation            | R190H          | leiomyoma uterine | 0.225 |
| 10461005 | PRL    | Gene expression     | expression     | leiomyoma uterine | 0.225 |
| 1531577  | GNRHR  | Regulation          | role           | leiomyoma uterine | 0.223 |
| 14566855 | TSC2   | Negative regulation | defect         | leiomyoma uterine | 0.222 |
| 17652152 | DDIT3  | Negative regulation | modulating     | leiomyoma uterine | 0.22  |
| 17697600 | CCL5   | Gene expression     | expression     | leiomyoma uterine | 0.218 |
| 16613890 | EGF    | Gene expression     | expression     | leiomyoma uterine | 0.218 |
| 2764227  | PGR    | Gene expression     | expressed      | leiomyoma uterine | 0.216 |
| 11704174 | STS    | Localization        | localization   | leiomyoma uterine | 0.213 |
| 18203783 | MKI67  | Gene expression     | expressions    | leiomyoma uterine | 0.213 |
| 2126737  | GNRH1  | Localization        | release        | leiomyoma uterine | 0.212 |
| 17506483 | CGA    | Gene expression     | found          | leiomyoma uterine | 0.212 |
| 17970643 | GNRHR  | Gene expression     | expression     | leiomyoma uterine | 0.212 |
| 16113040 | GNRH1  | Gene expression     | production     | leiomyoma uterine | 0.21  |
| 18182067 | MIR18A | Gene expression     | expression     | leiomyoma uterine | 0.209 |
| 2110713  | ESR1   | Negative regulation | suppresses     | leiomyoma uterine | 0.209 |
| 15586379 | THBS1  | Gene expression     | expression     | leiomyoma uterine | 0.208 |
| 15043312 | SUZ12  | Transcription       | transcripts    | leiomyoma uterine | 0.207 |
| 15972578 | WNT5B  | Gene expression     | Overexpression | leiomyoma uterine | 0.206 |
| 17636224 | DES    | Gene expression     | exposed        | leiomyoma uterine | 0.206 |
| 17362977 | EDEM1  | Gene expression     | found          | leiomyoma uterine | 0.206 |
| 12145978 | FSHR   | Localization        | secretion      | leiomyoma uterine | 0.206 |
| 17290603 | MUC16  | Positive regulation | elevated       | leiomyoma uterine | 0.206 |

|          |         |                     |                  |                   |       |
|----------|---------|---------------------|------------------|-------------------|-------|
| 17022307 | PLOD1   | Localization        | release          | leiomyoma uterine | 0.205 |
| 7779084  | TERF1   | Negative regulation | reduction        | leiomyoma uterine | 0.204 |
| 15042000 | TP53    | Positive regulation | induction        | leiomyoma uterine | 0.203 |
| 10782888 | DES     | Localization        | localized        | leiomyoma uterine | 0.201 |
| 17718906 | EGR3    | Gene expression     | expression       | leiomyoma uterine | 0.2   |
| 16623782 | PGR     | Gene expression     | expressed        | leiomyoma uterine | 0.198 |
| 12218210 | IL1R1   | Gene expression     | Expression       | leiomyoma uterine | 0.198 |
| 16831287 | CD34    | Gene expression     | expression       | leiomyoma uterine | 0.196 |
| 15112348 | KIT     | Gene expression     | expression       | leiomyoma uterine | 0.196 |
| 18617617 | IL8     | Gene expression     | expression       | leiomyoma uterine | 0.187 |
| 17072826 | TDGF1   | Gene expression     | Overexpression   | leiomyoma uterine | 0.187 |
| 17222838 | TGFB3   | Gene expression     | underexpression  | leiomyoma uterine | 0.186 |
| 1392332  | ESR1    | Positive regulation | negative         | leiomyoma uterine | 0.184 |
| 12125998 | PGR     | Gene expression     | positive         | leiomyoma uterine | 0.183 |
| 12649180 | ESR1    | Negative regulation | Inhibition       | leiomyoma uterine | 0.181 |
| 11865300 | FH      | Negative regulation | reduced          | leiomyoma uterine | 0.181 |
| 26457356 | FH      | Localization        | Detection        | leiomyoma uterine | 0.181 |
| 15967901 | HRAS    | Positive regulation | positive         | leiomyoma uterine | 0.18  |
| 17439725 | SRC     | Binding             | associated       | leiomyoma uterine | 0.176 |
| 17306671 | PIK3R1  | Positive regulation | Requirements     | leiomyoma uterine | 0.176 |
| 26783463 | CYP19A1 | Negative regulation | inhibitors       | leiomyoma uterine | 0.176 |
| 11788889 | GNRH1   | Regulation          | effect           | leiomyoma uterine | 0.175 |
| 15232741 | ENO2    | Localization        | locations        | leiomyoma uterine | 0.174 |
| 7805461  | HRAS    | Gene expression     | lower-expression | leiomyoma uterine | 0.173 |
| 12620453 | CYP19A1 | Negative regulation | inhibitor        | leiomyoma uterine | 0.173 |
| 18539894 | ESR1    | Gene expression     | expression       | leiomyoma uterine | 0.173 |
| 17361005 | MAPK1   | Gene expression     | expression       | leiomyoma uterine | 0.171 |
| 15255840 | FSHR    | Positive regulation | increments       | leiomyoma uterine | 0.171 |
| 12215337 | PECAM1  | Gene expression     | Expression       | leiomyoma uterine | 0.171 |
| 25922306 | TET1    | Positive regulation | elevated         | leiomyoma uterine | 0.169 |
| 15958792 | HMGA1   | Regulation          | affecting        | leiomyoma uterine | 0.169 |
| 12057733 | GNRH1   | Regulation          | effect           | leiomyoma uterine | 0.167 |
| 16607449 | EDEM1   | Gene expression     | expression       | leiomyoma uterine | 0.167 |
| 10329038 | TP53    | Protein catabolism  | degradation      | leiomyoma uterine | 0.166 |
| 17724803 | TEK     | Gene expression     | expression       | leiomyoma uterine | 0.166 |
| 15938828 | SMN1    | Gene expression     | expression       | leiomyoma uterine | 0.166 |

|          |         |                     |                  |                   |       |
|----------|---------|---------------------|------------------|-------------------|-------|
| 10593388 | CYP2C9  | Gene expression     | expression       | leiomyoma uterine | 0.166 |
| 17602685 | ESR1    | Gene expression     | expression       | leiomyoma uterine | 0.163 |
| 17415642 | RAPH1   | Gene expression     | transformation   | leiomyoma uterine | 0.162 |
| 15987702 | HIF1A   | Gene expression     | over-expression  | leiomyoma uterine | 0.162 |
| 18089612 | THBS2   | Gene expression     | expression       | leiomyoma uterine | 0.16  |
| 14501815 | FGF2    | Gene expression     | expressing       | leiomyoma uterine | 0.158 |
| 16122189 | CP      | Gene expression     | synthesize       | leiomyoma uterine | 0.156 |
| 16429426 | RPL22P1 | Gene expression     | positive         | leiomyoma uterine | 0.156 |
| 17253165 | KIT     | Gene expression     | expressions      | leiomyoma uterine | 0.155 |
| 15448018 | TCEB1   | Binding             | complex          | leiomyoma uterine | 0.15  |
| 19091325 | PGR     | Gene expression     | expressed        | leiomyoma uterine | 0.149 |
| 18559518 | EPAS1   | Gene expression     | expressed        | leiomyoma uterine | 0.148 |
| 17237842 | GNRH1   | Negative regulation | downregulation   | leiomyoma uterine | 0.144 |
| 26534934 | EXOSC10 | Gene expression     | expression       | leiomyoma uterine | 0.144 |
| 17360930 | FBN1    | Gene expression     | expression       | leiomyoma uterine | 0.143 |
| 15623465 | BAX     | Gene expression     | expression       | leiomyoma uterine | 0.141 |
| 14748838 | ITGB1   | Gene expression     | expression       | leiomyoma uterine | 0.141 |
| 17020966 | FZD4    | Binding             | recognized       | leiomyoma uterine | 0.14  |
| 12942572 | CAPN6   | Gene expression     | overexpressed    | leiomyoma uterine | 0.138 |
| 16009172 | ANGPT2  | Mutation            | G/A              | leiomyoma uterine | 0.138 |
| 19189127 | KIT     | Mutation            | S566R            | leiomyoma uterine | 0.138 |
| 20043998 | SRC     | Mutation            | T47D             | leiomyoma uterine | 0.138 |
| 9740667  | BCR     | Mutation            | S1461E           | leiomyoma uterine | 0.138 |
| 20628236 | FH      | Mutation            | p.Gly232AspfsX24 | leiomyoma uterine | 0.138 |
| 21119048 | CDK2    | Mutation            | T47D             | leiomyoma uterine | 0.138 |
| 23607964 | PGR     | Mutation            | T47D             | leiomyoma uterine | 0.138 |
| 17270241 | FH      | Mutation            | N330S            | leiomyoma uterine | 0.138 |
| 24525513 | NF2     | Mutation            | c.362+1G>A       | leiomyoma uterine | 0.138 |
| 16477632 | FH      | Mutation            | K424R            | leiomyoma uterine | 0.138 |
| 16639410 | FH      | Mutation            | 435insAAA        | leiomyoma uterine | 0.138 |
| 22867999 | FH      | Mutation            | p.His192Asp      | leiomyoma uterine | 0.138 |
| 15073606 | TP53    | Mutation            | E336X            | leiomyoma uterine | 0.138 |
| 18729310 | MEN1    | Mutation            | D350V            | leiomyoma uterine | 0.138 |
| 14681320 | INHA    | Gene expression     | expression       | leiomyoma uterine | 0.137 |
| 14707872 | CCND1   | Gene expression     | Overexpression   | leiomyoma uterine | 0.137 |
| 17635941 | ESR1    | Positive regulation | induced          | leiomyoma uterine | 0.134 |

|          |         |                     |                   |                   |       |
|----------|---------|---------------------|-------------------|-------------------|-------|
| 15171320 | ESR1    | Gene expression     | expressed         | leiomyoma uterine | 0.133 |
| 16172143 | RXRA    | Gene expression     | expressions       | leiomyoma uterine | 0.131 |
| 15044692 | PLOD1   | Negative regulation | decreased         | leiomyoma uterine | 0.13  |
| 17211469 | FH      | Negative regulation | diminished/absent | leiomyoma uterine | 0.13  |
| 10235477 | DDT     | Negative regulation | effect            | leiomyoma uterine | 0.127 |
| 16952848 | KIT     | Gene expression     | express           | leiomyoma uterine | 0.125 |
| 11979371 | CD34    | Gene expression     | positive          | leiomyoma uterine | 0.125 |
| 15249743 | ADIPOQ  | Negative regulation | decreased         | leiomyoma uterine | 0.124 |
| 18565690 | MME     | Gene expression     | expression        | leiomyoma uterine | 0.124 |
| 11955330 | KIT     | Positive regulation | negative          | leiomyoma uterine | 0.123 |
| 10228907 | MUC16   | Positive regulation | elevated          | leiomyoma uterine | 0.12  |
| 17646097 | EDEM1   | Gene expression     | expression        | leiomyoma uterine | 0.119 |
| 17291269 | SMUG1   | Gene expression     | using             | leiomyoma uterine | 0.119 |
| 12669243 | SCLC1   | Positive regulation | generate          | leiomyoma uterine | 0.119 |
| 12839670 | KIT     | Gene expression     | negative          | leiomyoma uterine | 0.117 |
| 2189250  | VIM     | Binding             | positivity        | leiomyoma uterine | 0.117 |
| 16996566 | DES     | Positive regulation | negative          | leiomyoma uterine | 0.116 |
| 1587488  | B3GAT1  | Gene expression     | positive          | leiomyoma uterine | 0.116 |
| 12801270 | NBR1    | Positive regulation | elevated          | leiomyoma uterine | 0.113 |
| 10685334 | PLOD1   | Localization        | secretion         | leiomyoma uterine | 0.111 |
| 15335251 | MME     | Positive regulation | negative          | leiomyoma uterine | 0.108 |
| 12823048 | ACTC1   | Binding             | negative          | leiomyoma uterine | 0.108 |
| 16563231 | TP63    | Gene expression     | leiomyosarcomas   | leiomyoma uterine | 0.108 |
| 16860797 | PPY     | Binding             | associated        | leiomyoma uterine | 0.107 |
| 2126024  | PLOD1   | Negative regulation | suppressed        | leiomyoma uterine | 0.106 |
| 10726441 | PLOD1   | Positive regulation | levels            | leiomyoma uterine | 0.106 |
| 10559617 | KLK3    | Regulation          | influence         | leiomyoma uterine | 0.106 |
| 12144683 | LDHC    | Positive regulation | elevated          | leiomyoma uterine | 0.105 |
| 26468330 | HMGA2   | Gene expression     | coexist           | leiomyoma uterine | 0.105 |
| 18248652 | TGFB3   | Gene expression     | expression        | leiomyoma uterine | 0.104 |
| 15374708 | MAP3K5  | Binding             | interest          | leiomyoma uterine | 0.103 |
| 16641167 | CYP19A1 | Regulation          | effect            | leiomyoma uterine | 0.103 |
| 17010149 | PLAUR   | Negative regulation | decreased         | leiomyoma uterine | 0.101 |
| 10051989 | DES     | Positive regulation | negative          | leiomyoma uterine | 0.101 |
| 16954695 | TKT     | Gene expression     | transfected       | leiomyoma uterine | 0.1   |
| 12893208 | KIT     | Gene expression     | expression        | leiomyoma uterine | 0.099 |

|          |          |                     |                |                   |       |
|----------|----------|---------------------|----------------|-------------------|-------|
| 10499074 | COL4A2   | Gene expression     | overexpression | leiomyoma uterine | 0.098 |
| 10686944 | HMGA2    | Regulation          | affected       | leiomyoma uterine | 0.098 |
| 16997932 | PGR      | Regulation          | affected       | leiomyoma uterine | 0.095 |
| 25735342 | ACE      | Regulation          | influence      | leiomyoma uterine | 0.094 |
| 15760950 | XRCC1    | Binding             | associated     | leiomyoma uterine | 0.094 |
| 10534170 | DES      | Positive regulation | negative       | leiomyoma uterine | 0.094 |
| 16365012 | RRS1     | Positive regulation | increases      | leiomyoma uterine | 0.093 |
| 12385821 | PGR      | Gene expression     | expression     | leiomyoma uterine | 0.092 |
| 16363371 | EGF      | Binding             | bind           | leiomyoma uterine | 0.092 |
| 15823826 | MKI67    | Gene expression     | expression     | leiomyoma uterine | 0.092 |
| 25824050 | CYP19A1  | Negative regulation | inhibitors     | leiomyoma uterine | 0.091 |
| 7804565  | LPL      | Gene expression     | assessed       | leiomyoma uterine | 0.09  |
| 16810068 | ACTC1    | Positive regulation | negative       | leiomyoma uterine | 0.09  |
| 19108974 | NR3C2    | Binding             | intensity      | leiomyoma uterine | 0.09  |
| 17605689 | NR3C2    | Gene expression     | produced       | leiomyoma uterine | 0.089 |
| 16390776 | FSHR     | Gene expression     | expression     | leiomyoma uterine | 0.089 |
| 16649417 | CYP19A1  | Regulation          | use            | leiomyoma uterine | 0.089 |
| 19706309 | GNRH1    | Negative regulation | inhibits       | leiomyoma uterine | 0.088 |
| 18216291 | LCN2     | Negative regulation | inhibitors     | leiomyoma uterine | 0.087 |
| 17342290 | PLOD2    | Binding             | occurred       | leiomyoma uterine | 0.087 |
| 19122463 | EBAG9    | Regulation          | alterations    | leiomyoma uterine | 0.086 |
| 15618963 | HMGA2    | Gene expression     | expression     | leiomyoma uterine | 0.086 |
| 15587289 | KIT      | Gene expression     | expression     | leiomyoma uterine | 0.086 |
| 10796723 | GNRH1    | Gene expression     | improved       | leiomyoma uterine | 0.085 |
| 10383697 | ENO2     | Binding             | negativity     | leiomyoma uterine | 0.085 |
| 15665689 | ADC      | Localization        | embolization   | leiomyoma uterine | 0.084 |
| 15205403 | LCK      | Negative regulation | inhibitors     | leiomyoma uterine | 0.083 |
| 18226017 | S100B    | Gene expression     | negative       | leiomyoma uterine | 0.083 |
| 26458617 | PGR      | Gene expression     | negative       | leiomyoma uterine | 0.083 |
| 2140991  | SNORA62  | Negative regulation | decrease       | leiomyoma uterine | 0.081 |
| 9160309  | DES      | Gene expression     | negative       | leiomyoma uterine | 0.08  |
| 12024318 | S100B    | Gene expression     | positive       | leiomyoma uterine | 0.08  |
| 14501826 | VIM      | Regulation          | immunoreactive | leiomyoma uterine | 0.08  |
| 12411015 | VEGFA    | Gene expression     | expression     | leiomyoma uterine | 0.08  |
| 15039185 | SERPINB1 | Regulation          | calculated     | leiomyoma uterine | 0.079 |
| 15083381 | HSD17B7  | Gene expression     | overexpressed  | leiomyoma uterine | 0.079 |

|          |         |                     |                |                   |       |
|----------|---------|---------------------|----------------|-------------------|-------|
| 15213600 | MME     | Gene expression     | positive       | leiomyoma uterine | 0.079 |
| 10397250 | ESR1    | Regulation          | modulate       | leiomyoma uterine | 0.079 |
| 9169041  | HMGA2   | Gene expression     | detected       | leiomyoma uterine | 0.078 |
| 26037152 | MED12   | Regulation          | regulator      | leiomyoma uterine | 0.077 |
| 10856486 | ESR2    | Positive regulation | Expression     | leiomyoma uterine | 0.076 |
| 1710946  | S100B   | Positive regulation | negative       | leiomyoma uterine | 0.074 |
| 15307213 | ACTC1   | Gene expression     | detect         | leiomyoma uterine | 0.073 |
| 18154577 | CD34    | Gene expression     | expressed      | leiomyoma uterine | 0.073 |
| 12494390 | PCYT1A  | Localization        | localization   | leiomyoma uterine | 0.073 |
| 15571618 | MME     | Gene expression     | expression     | leiomyoma uterine | 0.073 |
| 16462152 | CDKN2A  | Gene expression     | expression     | leiomyoma uterine | 0.073 |
| 1296036  | VIM     | Positive regulation | positive       | leiomyoma uterine | 0.067 |
| 18555231 | HOXA10  | Gene expression     | expression     | leiomyoma uterine | 0.067 |
| 2070087  | VEGFA   | Regulation          | influence      | leiomyoma uterine | 0.065 |
| 1317649  | GNRH1   | Positive regulation | promoted       | leiomyoma uterine | 0.065 |
| 10502446 | RAPH1   | Gene expression     | transformation | leiomyoma uterine | 0.064 |
| 16802186 | AGRP    | Negative regulation | reduces        | leiomyoma uterine | 0.064 |
| 10679920 | HMGA2   | Regulation          | affected       | leiomyoma uterine | 0.063 |
| 12296380 | PLA2G2A | Positive regulation | up-regulation  | leiomyoma uterine | 0.063 |
| 12135868 | FSHR    | Positive regulation | null           | leiomyoma uterine | 0.062 |
| 17285575 | None    | Negative regulation | deletion       | leiomyoma uterine | 0.062 |
| 1283316  | DDIT3   | Positive regulation | assumed        | leiomyoma uterine | 0.062 |
| 1287735  | NR3C2   | Gene expression     | appearance     | leiomyoma uterine | 0.061 |
| 16443507 | PLOD1   | Positive regulation | activating     | leiomyoma uterine | 0.061 |
| 10565301 | RAD51B  | Regulation          | interrupted    | leiomyoma uterine | 0.059 |
| 18156978 | CDKN2A  | Gene expression     | overexpression | leiomyoma uterine | 0.058 |
| 1539451  | DES     | Gene expression     | positive       | leiomyoma uterine | 0.058 |
| 16408199 | EGF     | Gene expression     | positive       | leiomyoma uterine | 0.058 |
| 12207602 | CR2     | Transcription       | demonstrated   | leiomyoma uterine | 0.057 |
| 18177646 | XRCC4   | Binding             | associated     | leiomyoma uterine | 0.056 |
| 16209296 | BCL2    | Gene expression     | studied        | leiomyoma uterine | 0.056 |
| 17418408 | HIF1A   | Gene expression     | overexpressed  | leiomyoma uterine | 0.054 |
| 18214799 | TNF     | Gene expression     | synthesis      | leiomyoma uterine | 0.052 |
| 12963511 | FSHR    | Gene expression     | levels         | leiomyoma uterine | 0.052 |
| 17690535 | NR3C2   | Gene expression     | resonance      | leiomyoma uterine | 0.052 |
| 2663055  | VIM     | Gene expression     | positive       | leiomyoma uterine | 0.051 |

|          |          |                     |                  |                   |       |
|----------|----------|---------------------|------------------|-------------------|-------|
| 2061492  | NR3C2    | Binding             | imaging          | leiomyoma uterine | 0.051 |
| 10730274 | COL4A6   | Positive regulation | Mutations        | leiomyoma uterine | 0.05  |
| 15163025 | S100B    | Gene expression     | positive         | leiomyoma uterine | 0.049 |
| 17243163 | HMGA2    | Binding             | one              | leiomyoma uterine | 0.046 |
| 12834940 | TNFRSF1A | Positive regulation | increase         | leiomyoma uterine | 0.046 |
| 18538038 | MLANA    | Positive regulation | requires         | leiomyoma uterine | 0.046 |
| 12637757 | PC       | Negative regulation | decreases        | leiomyoma uterine | 0.044 |
| 16359541 | TP63     | Binding             | diagnosis        | leiomyoma uterine | 0.044 |
| 10502173 | NT5E     | Localization        | resection        | leiomyoma uterine | 0.044 |
| 10674844 | PLP2     | Gene expression     | resection        | leiomyoma uterine | 0.044 |
| 1535909  | FLG2     | Localization        | located          | leiomyoma uterine | 0.044 |
| 16082144 | NR3C2    | Regulation          | Control          | leiomyoma uterine | 0.044 |
| 14708972 | SDHB     | Positive regulation | succinate        | leiomyoma uterine | 0.044 |
| 15956493 | NR3C2    | Gene expression     | imaging          | leiomyoma uterine | 0.043 |
| 17197920 | JAZF1    | Localization        | located          | leiomyoma uterine | 0.043 |
| 11960042 | GNRHR    | Gene expression     | received         | leiomyoma uterine | 0.043 |
| 16114791 | COL4A6   | Protein catabolism  | analysis         | leiomyoma uterine | 0.042 |
| 15088185 | DAP      | Gene expression     | product          | leiomyoma uterine | 0.041 |
| 21656660 | EZH2     | Phosphorylation     | phosphorylates   | leiomyoma uterine | 0.041 |
| 12434668 | COCH     | Gene expression     | using            | leiomyoma uterine | 0.041 |
| 2145765  | GNRHR    | Positive regulation | induce           | leiomyoma uterine | 0.041 |
| 12940465 | GNRH1    | Regulation          | changes          | leiomyoma uterine | 0.04  |
| 11866950 | CDKN2A   | Positive regulation | Hypermethylation | leiomyoma uterine | 0.04  |
| 16125217 | MCM8     | Binding             | gained           | leiomyoma uterine | 0.039 |
| 15543383 | RAG1     | Gene expression     | negative         | leiomyoma uterine | 0.039 |
| 17127852 | KIT      | Gene expression     | coexpressed      | leiomyoma uterine | 0.039 |
| 11020519 | ESR1     | Negative regulation | decreased        | leiomyoma uterine | 0.039 |
| 1709853  | GNRH1    | Gene expression     | synthetic        | leiomyoma uterine | 0.038 |
| 16547985 | ELANE    | Gene expression     | Milwaukee        | leiomyoma uterine | 0.038 |
| 17652533 | LMOD1    | Gene expression     | positive         | leiomyoma uterine | 0.038 |
| 12006687 | MRPS18C  | Gene expression     | imaging          | leiomyoma uterine | 0.038 |
| 16955562 | KRT7     | Regulation          | positivity       | leiomyoma uterine | 0.036 |
| 17403306 | TNFRSF1A | Regulation          | calculated       | leiomyoma uterine | 0.034 |
| 19083394 | TNF      | Negative regulation | decreased        | leiomyoma uterine | 0.034 |
| 16676196 | ACTC1    | Binding             | negative         | leiomyoma uterine | 0.033 |
| 19630579 | FUS      | Localization        | release          | leiomyoma uterine | 0.033 |

|          |         |                     |                |                   |       |
|----------|---------|---------------------|----------------|-------------------|-------|
| 17298155 | PGR     | Gene expression     | levels         | leiomyoma uterine | 0.033 |
| 17346524 | CRP     | Negative regulation | measurement    | leiomyoma uterine | 0.033 |
| 20969451 | RHD     | Positive regulation | formulation    | leiomyoma uterine | 0.033 |
| 17222831 | IL18    | Binding             | associated     | leiomyoma uterine | 0.033 |
| 16144493 | PLOD1   | Localization        | secretion      | leiomyoma uterine | 0.033 |
| 11734258 | PLOD1   | Localization        | secretion      | leiomyoma uterine | 0.033 |
| 17350961 | MANF    | Negative regulation | effect         | leiomyoma uterine | 0.032 |
| 12858116 | GNRHR   | Negative regulation | blocking       | leiomyoma uterine | 0.032 |
| 15523491 | FH      | Binding             | associated     | leiomyoma uterine | 0.03  |
| 15334541 | FH      | Negative regulation | predispose     | leiomyoma uterine | 0.03  |
| 19075141 | FH      | Binding             | affected       | leiomyoma uterine | 0.03  |
| 15004438 | MMP2    | Gene expression     | found          | leiomyoma uterine | 0.028 |
| 19063937 | PRKAR1A | Positive regulation | mutated        | leiomyoma uterine | 0.028 |
| 17675621 | C2      | Binding             | embolization   | leiomyoma uterine | 0.027 |
| 16358102 | VIM     | Gene expression     | positive       | leiomyoma uterine | 0.027 |
| 16319128 | PAPPA   | Gene expression     | detected       | leiomyoma uterine | 0.027 |
| 17654722 | HMGA2   | Positive regulation | rearrangements | leiomyoma uterine | 0.025 |
| 18566572 | CLDN1   | Regulation          | deregulated    | leiomyoma uterine | 0.024 |
| 16686944 | RAPH1   | Binding             | associated     | leiomyoma uterine | 0.024 |
| 12584627 | CRP     | Positive regulation | increase       | leiomyoma uterine | 0.018 |
| 19135929 | SMUG1   | Positive regulation | increased      | leiomyoma uterine | 0.017 |
| 16105928 | NR3C2   | Binding             | embolization   | leiomyoma uterine | 0.01  |
| 19075141 | FH      | Binding             | affected       | leiomyoma uterine | 0.03  |
| 15004438 | MMP2    | Gene expression     | found          | leiomyoma uterine | 0.028 |
| 19063937 | PRKAR1A | Positive regulation | mutated        | leiomyoma uterine | 0.028 |
| 17675621 | C2      | Binding             | embolization   | leiomyoma uterine | 0.027 |
| 16358102 | VIM     | Gene expression     | positive       | leiomyoma uterine | 0.027 |
| 16319128 | PAPPA   | Gene expression     | detected       | leiomyoma uterine | 0.027 |
| 17654722 | HMGA2   | Positive regulation | rearrangements | leiomyoma uterine | 0.025 |



### Identified known therapeutic gene targets about UFs in Drugbank database

| Drugs                       |            | Targets   |            | Actions                 |
|-----------------------------|------------|-----------|------------|-------------------------|
| Drug name                   | CAS number | Gene name | Uniprot ID |                         |
| Oxytocin                    | 50-56-6    | OXTR      | P30559     | Agonist                 |
|                             |            | OXT       | P01178     | Binder                  |
| Leuprolide                  | 53714-56-0 | GNRHR     | P30968     | Agonist                 |
| Terbutaline                 | 23031-25-6 | ADRB2     | P07550     | Agonist                 |
|                             |            | ADRB3     | P13945     | Agonist                 |
|                             |            | ADRB1     | P08588     | Antagonist              |
| Hydroxyprogesterone         | 630-56-8   | PGR       | P06401     | Agonist                 |
| Progesterone                | 57-83-0    | PGR       | P06401     | Agonist                 |
|                             |            | ESR1      | P03372     | Agonist/Inhibitor       |
|                             |            | NR3C2     | P08235     | Antagonist/Agonist      |
|                             |            | CYP17A1   | P05093     | Substrate/Inhibitor     |
|                             |            | OPRK1     | P41145     | Activator/Potentiator   |
|                             |            | ORM1      | P02763     | Binder                  |
|                             |            | NR3C1     | P04150     | Partial agonist         |
|                             |            | AR        | P10275     | Agonist/Potentiator     |
|                             |            | SHBG      | P04278     | Binder/Potentiator      |
|                             |            | ESR2      | Q92731     | Agonist/Downregulator   |
| Medroxyprogesterone acetate | 71-58-9    | PGR       | P06401     | Agonist                 |
|                             |            | ESR1      | P03372     | Agonist                 |
| Misoprostol                 | 59122-46-2 | PTGER3    | P43115     | Agonist                 |
|                             |            | PTGER2    | P43116     | Agonist                 |
|                             |            | PTGER4    | P35408     | Agonist                 |
| Ergotamine                  | 113-15-5   | HTR1D     | P28221     | Agonist                 |
|                             |            | HTR1B     | P28222     | Agonist                 |
|                             |            | HTR2A     | P28223     | Agonist                 |
|                             |            | DRD2      | P14416     | Agonist                 |
|                             |            | ADRA1A    | P35348     | Partial agonist         |
|                             |            | ADRA1B    | P35368     | Partial agonist         |
|                             |            | ADRA1D    | P25100     | Partial agonist         |
|                             |            | ADRA2A    | P08913     | Partial agonist         |
|                             |            | ADRA2B    | P18089     | Agonist/Partial agonist |
|                             |            | SLC6A2    | P23975     | Inhibitor               |
|                             |            | DRD1      | P21728     | agonist                 |
|                             |            | DRD5      | P21918     | agonist                 |
|                             |            | HTR1A     | P08908     | agonist                 |
| HTR1F                       | P30939     | agonist   |            |                         |

|                            |              |          |        |            |
|----------------------------|--------------|----------|--------|------------|
|                            |              | HTR2C    | P28335 | agonist    |
|                            |              | HTR2B    | P41595 | unknown    |
| Raloxifene                 | 84449-90-1   | ESR1     | P03372 | Agonist    |
|                            |              | ESR2     | Q92731 | Agonist    |
| Larotrectinib              | 1223403-58-4 | NTRK1    | P04629 | Inhibitor  |
|                            |              | NTRK2    | Q16620 | Inhibitor  |
|                            |              | NTRK3    | Q16288 | Inhibitor  |
| Ivosidenib                 | 1448347-49-6 | IDH1     | O75874 | Inhibitor  |
| D-alpha-Tocopherol acetate | 58-95-7      | SEC14L4  | Q9UDX3 | unknown    |
|                            |              | SEC14L3  | Q9UDX4 | unknown    |
|                            |              | SEC14L2  | O76054 | unknown    |
|                            |              | NR1I2    | O75469 | unknown    |
|                            |              | PRKCB    | P05771 | unknown    |
|                            |              | ALOX5    | P09917 | unknown    |
|                            |              | PRKCA    | P17252 | unknown    |
|                            |              | DGKA     | P23743 | unknown    |
|                            |              | PPP2CB   | P62714 | unknown    |
|                            |              | PPP2CA   | P67775 | unknown    |
| Nabumetone                 | 42924-53-8   | PTGS2    | P35354 | Inhibitor  |
|                            |              | PTGS1    | P23219 | Inhibitor  |
| Methylephedrine            | 113-42-8     | DRD1     | P21728 | Antagonist |
|                            |              | HTR2B    | P41595 | unknown    |
| Dinoprostone               | 363-24-6     | PTGER2   | P43116 | Agonist    |
|                            |              | PTGER1   | P34995 | Agonist    |
|                            |              | PTGER3   | P43115 | Agonist    |
|                            |              | PTGER4   | P35408 | Agonist    |
|                            |              | PTGDR2   | Q9Y5Y4 | Agonist    |
| Letrozole                  | 112809-51-5  | CYP19A1  | P11511 | Antagonist |
| Elagolix                   | 834153-87-6  | GNRHR    | P30968 | unknown    |
| Testosterone cypionate     | 58-20-8      | AR       | P10275 | Agonist    |
|                            |              | ESR1     | P03372 | unknown    |
|                            |              | NR3C2    | P08235 | unknown    |
| Duvelisib                  | 1201438-56-3 | PIK3CG   | P48736 | Inhibitor  |
|                            |              | PIK3CD   | O00329 | Inhibitor  |
| Mifepristone               | 84371-65-3   | PGR      | P06401 | Antagonist |
|                            |              | NR3C1    | P04150 | Antagonist |
|                            |              | KLK3     | P07288 | unknown    |
|                            |              | NR1I2    | O75469 | unknown    |
| Magnesium sulfate          | 7487-88-9    | CACNG1   | Q06432 | unknown    |
|                            |              | CACNA2D1 | P54289 | unknown    |

|               |            |         |        |                    |
|---------------|------------|---------|--------|--------------------|
|               |            | CACNA1C | Q13936 | unknown            |
|               |            | CACNB1  | Q02641 | unknown            |
|               |            | CACNB2  | Q08289 | unknown            |
|               |            | CACNA1S | Q13698 | unknown            |
| Salbutamol    | 18559-94-9 | ADRB2   | P07550 | Agonist            |
|               |            | ADRB1   | P08588 | Agonist            |
|               |            | ADRB3   | P13945 | agonist with low   |
| Spirolactone  | 1952-1-7   | NR3C2   | P08235 | Antagonist         |
|               |            | AR      | P10275 | Antagonist         |
|               |            | PGR     | P06401 | Agonist            |
|               |            | NR3C1   | P04150 | Antagonist         |
|               |            | CYP11B2 | P19099 | Antagonist         |
|               |            | CYP17A1 | P05093 | Antagonist         |
|               |            | SRD5A1  | P18405 | Antagonist         |
|               |            | SRD5A2  | P31213 | Antagonist         |
|               |            | SRD5A3  | Q9H8P0 | Antagonist         |
| Sertraline    | 79617-96-2 | SLC6A4  | P31645 | Inhibitor          |
|               |            | SLC6A3  | Q01959 | Inhibitor          |
|               |            | PGRMC1  | O00264 | Antagonist         |
|               |            | SIGMAR1 | Q99720 | Antagonist         |
| Epinephrine   | 51-43-4    | ADRA1A  | P35348 | Agonist            |
|               |            | ADRA1B  | P35368 | Agonist            |
|               |            | ADRB1   | P08588 | Agonist            |
|               |            | ADRB2   | P07550 | Agonist            |
|               |            | ADRA2A  | P08913 | Agonist            |
|               |            | ADRA2B  | P18089 | Agonist            |
|               |            | ADRA1D  | P25100 | Antagonist         |
|               |            | TNF     | P01375 | Antagonist/Agonist |
| Ibuprofen     | 15687-27-1 | PTGS2   | P35354 | Inhibitor          |
|               |            | PTGS1   | P23219 | Inhibitor          |
|               |            | BCL2    | P10415 | Modulator          |
|               |            | THBD    | P07204 | Inducer            |
|               |            | FABP2   | P12104 | Binder             |
|               |            | PPARG   | P37231 | Activator          |
|               |            | CFTR    | P13569 | Inhibitor          |
|               |            | PPARA   | Q07869 | Activator          |
|               |            | GP1BA   | P07359 | Inducer            |
|               |            | S100A7  | P31151 | Inducer            |
| Nitroglycerin | 55-63-0    | NPR1    | P16066 | Agonist            |
| Ropinirole    | 91374-21-9 | DRD3    | P35462 | Agonist            |

|                      |             |         |        |                    |
|----------------------|-------------|---------|--------|--------------------|
|                      |             | DRD4    | P21917 | Agonist            |
|                      |             | DRD2    | P14416 | Agonist            |
|                      |             | ADRA1A  | P35348 | Antagonist         |
|                      |             | ADRA1B  | P35368 | Antagonist         |
|                      |             | ADRA1D  | P25100 | Antagonist         |
|                      |             | ADRA2A  | P08913 | Antagonist         |
|                      |             | ADRA2B  | P18089 | Antagonist         |
|                      |             | ADRA2C  | P18825 | Antagonist         |
| Lidocaine            | 137-58-6    | SCN10A  | Q9Y5Y9 | Inhibitor          |
|                      |             | SCN9A   | Q15858 | Inhibitor          |
|                      |             | SCN5A   | Q14524 | Inhibitor          |
|                      |             | EGFR    | P00533 | Antagonist         |
|                      |             | SCN4A   | P35499 | unknown            |
|                      |             | ORM1    | P02763 | unknown            |
|                      |             | ORM2    | P19652 | unknown            |
| Castor oil           | 8001-79-4   | PTGER3  | P43115 | Agonist/Activator  |
|                      |             | PTGER4  | P35408 | Agonist            |
| Norethisterone       | 68-22-4     | PGR     | P06401 | Agonist            |
| Toremifene           | 89778-26-7  | ESR1    | P03372 | unknown            |
|                      |             | SHBG    | P04278 | unknown            |
| Bazedoxifene         | 198481-32-2 | ESR1    | P03372 | Antagonist/Agonist |
|                      |             | ESR2    | Q92731 | unknown            |
| Indapamide           | 26807-65-8  | SLC12A3 | P55017 | Inhibitor          |
| Dabigatran etexilate | 211915-06-9 | F2      | P00734 | Inhibitor          |
| Carboprost           | 58551-69-2  | PTGER1  | P34995 | Agonist            |
| Goserelin            | 65807-02-5  | LHCGR   | P22888 | Agonist            |
|                      |             | GNRHR   | P30968 | Agonist            |
| Ulipristal           | 159811-51-5 | PGR     | P06401 | Modulator          |
|                      |             | NR3C1   | P04150 | Antagonist         |
|                      |             | AR      | P10275 | unknown            |

**Table S4 Detailed information on topological features of XLW-UFs hubs in Cytoscape**

| <b>SUID</b> | <b>name</b> | <b>selected</b> | <b>shared name</b> | <b>Type</b> |
|-------------|-------------|-----------------|--------------------|-------------|
| 72          | IL1R1       | FALSE           | IL1R1              | Target-U    |
| 73          | GNAS        | FALSE           | GNAS               | Target-U    |
| 74          | HLA-C       | FALSE           | HLA-C              | Target-U    |
| 75          | UCHL1       | FALSE           | UCHL1              | Target-U    |
| 76          | DIH1        | FALSE           | DIH1               | Target-U    |
| 77          | E2F1        | FALSE           | E2F1               | Target-U    |
| 78          | ANTXR2      | FALSE           | ANTXR2             | Target-U    |
| 79          | NCOA1       | FALSE           | NCOA1              | Target-U    |
| 80          | EZH2        | FALSE           | EZH2               | Target-U    |
| 81          | CDH1        | FALSE           | CDH1               | Target-U    |
| 82          | CTNNB1      | FALSE           | CTNNB1             | Target-U    |
| 83          | TSHR        | FALSE           | TSHR               | Target-U    |
| 84          | TKT         | FALSE           | TKT                | Target-U    |
| 85          | AREG        | FALSE           | AREG               | Target-U    |
| 86          | TMEM37      | FALSE           | TMEM37             | Target-U    |
| 87          | MIR18A      | FALSE           | MIR18A             | Target-U    |
| 88          | PAGE4       | FALSE           | PAGE4              | Target-U    |
| 89          | ANXA1       | FALSE           | ANXA1              | Target-U    |
| 90          | RPL22P1     | FALSE           | RPL22P1            | Target-U    |
| 91          | DAP         | FALSE           | DAP                | Target-U    |
| 92          | CHKB        | FALSE           | CHKB               | Target-U    |
| 93          | GRK5        | FALSE           | GRK5               | Target-U    |
| 94          | HSD17B7     | FALSE           | HSD17B7            | Target-U    |
| 95          | BCR         | FALSE           | BCR                | Target-U    |
| 96          | TET1        | FALSE           | TET1               | Target-U    |
| 97          | SELENBP1    | FALSE           | SELENBP1           | Target-U    |
| 98          | PPP1R15A    | FALSE           | PPP1R15A           | Target-U    |
| 99          | CNN1        | FALSE           | CNN1               | Target-U    |
| 100         | EDN2        | FALSE           | EDN2               | Target-U    |
| 101         | EIF2AK1     | FALSE           | EIF2AK1            | Target-U    |
| 102         | MED12L      | FALSE           | MED12L             | Target-U    |
| 103         | GPR182      | FALSE           | GPR182             | Target-U    |
| 104         | LCK         | FALSE           | LCK                | Target-U    |
| 105         | FGFR1       | FALSE           | FGFR1              | Target-U    |
| 106         | OVGP1       | FALSE           | OVGP1              | Target-U    |
| 107         | IGFBP1      | FALSE           | IGFBP1             | Target-U    |
| 108         | ACVRL1      | FALSE           | ACVRL1             | Target-U    |
| 109         | HV1S        | FALSE           | HV1S               | Target-U    |
| 110         | TCEB1       | FALSE           | TCEB1              | Target-U    |
| 111         | ADAM17      | FALSE           | ADAM17             | Target-U    |
| 112         | RHD         | FALSE           | RHD                | Target-U    |
| 113         | DDT         | FALSE           | DDT                | Target-U    |
| 114         | LPL         | FALSE           | LPL                | Target-U    |
| 115         | B3GAT1      | FALSE           | B3GAT1             | Target-U    |
| 116         | PLOD2       | FALSE           | PLOD2              | Target-U    |
| 117         | CD99        | FALSE           | CD99               | Target-U    |
| 118         | FBLN1       | FALSE           | FBLN1              | Target-U    |
| 119         | TFPI        | FALSE           | TFPI               | Target-U    |

|     |         |       |         |          |
|-----|---------|-------|---------|----------|
| 120 | PTN     | FALSE | PTN     | Target-U |
| 121 | RAG1    | FALSE | RAG1    | Target-U |
| 122 | CDK10   | FALSE | CDK10   | Target-U |
| 123 | PCP4    | FALSE | PCP4    | Target-U |
| 124 | CD97    | FALSE | CD97    | Target-U |
| 125 | NCAM1   | FALSE | NCAM1   | Target-U |
| 126 | SLC4A1  | FALSE | SLC4A1  | Target-U |
| 127 | NR4A1   | FALSE | NR4A1   | Target-U |
| 128 | CAPN6   | FALSE | CAPN6   | Target-U |
| 129 | HSD17B2 | FALSE | HSD17B2 | Target-U |
| 130 | EGR1    | FALSE | EGR1    | Target-U |
| 131 | TGFBR2  | FALSE | TGFBR2  | Target-U |
| 132 | TCF4    | FALSE | TCF4    | Target-U |
| 133 | CDK4    | FALSE | CDK4    | Target-U |
| 134 | FZD4    | FALSE | FZD4    | Target-U |
| 135 | MAP3K5  | FALSE | MAP3K5  | Target-U |
| 136 | PLD5    | FALSE | PLD5    | Target-U |
| 137 | BSG     | FALSE | BSG     | Target-U |
| 138 | PDAP1   | FALSE | PDAP1   | Target-U |
| 139 | NT5E    | FALSE | NT5E    | Target-U |
| 140 | PLD2    | FALSE | PLD2    | Target-U |
| 141 | MEN1    | FALSE | MEN1    | Target-U |
| 142 | SIRPA   | FALSE | SIRPA   | Target-U |
| 143 | MRPS18C | FALSE | MRPS18C | Target-U |
| 144 | TCEB2   | FALSE | TCEB2   | Target-U |
| 145 | ALK     | FALSE | ALK     | Target-U |
| 146 | CST6    | FALSE | CST6    | Target-U |
| 147 | AP1S2   | FALSE | AP1S2   | Target-U |
| 148 | PLAUR   | FALSE | PLAUR   | Target-U |
| 149 | CYP2C9  | FALSE | CYP2C9  | Target-U |
| 150 | C3      | FALSE | C3      | Target-U |
| 151 | RPL22   | FALSE | RPL22   | Target-U |
| 152 | MLANA   | FALSE | MLANA   | Target-U |
| 153 | BMP6    | FALSE | BMP6    | Target-U |
| 154 | RXRG    | FALSE | RXRG    | Target-U |
| 155 | DNMT1   | FALSE | DNMT1   | Target-U |
| 156 | PLP2    | FALSE | PLP2    | Target-U |
| 157 | TYRO3   | FALSE | TYRO3   | Target-U |
| 158 | LTBP1   | FALSE | LTBP1   | Target-U |
| 159 | MUSK    | FALSE | MUSK    | Target-U |
| 160 | CALCA   | FALSE | CALCA   | Target-U |
| 161 | ZKSCAN7 | FALSE | ZKSCAN7 | Target-U |
| 162 | IL11    | FALSE | IL11    | Target-U |
| 163 | IL17B   | FALSE | IL17B   | Target-U |
| 164 | ANGPT2  | FALSE | ANGPT2  | Target-U |
| 165 | CR1     | FALSE | CR1     | Target-U |
| 166 | GAL     | FALSE | GAL     | Target-U |
| 167 | HSPA5   | FALSE | HSPA5   | Target-U |
| 168 | TP53RK  | FALSE | TP53RK  | Target-U |
| 169 | MRGPRX3 | FALSE | MRGPRX3 | Target-U |
| 170 | HAVCR1  | FALSE | HAVCR1  | Target-U |

|     |          |       |          |          |
|-----|----------|-------|----------|----------|
| 171 | TERF1    | FALSE | TERF1    | Target-U |
| 172 | CYR61    | FALSE | CYR61    | Target-U |
| 173 | TNFRSF21 | FALSE | TNFRSF21 | Target-U |
| 174 | CCL5     | FALSE | CCL5     | Target-U |
| 175 | AVP      | FALSE | AVP      | Target-U |
| 176 | FZD2     | FALSE | FZD2     | Target-U |
| 177 | SCLC1    | FALSE | SCLC1    | Target-U |
| 178 | PRKAR1A  | FALSE | PRKAR1A  | Target-U |
| 179 | ERBB2    | FALSE | ERBB2    | Target-U |
| 180 | VHL      | FALSE | VHL      | Target-U |
| 181 | CR2      | FALSE | CR2      | Target-U |
| 182 | FBLN5    | FALSE | FBLN5    | Target-U |
| 183 | PTPRU    | FALSE | PTPRU    | Target-U |
| 184 | CXCL14   | FALSE | CXCL14   | Target-U |
| 185 | AKR1C4   | FALSE | AKR1C4   | Target-U |
| 186 | IFNG     | FALSE | IFNG     | Target-U |
| 187 | C2       | FALSE | C2       | Target-U |
| 188 | BNIP3    | FALSE | BNIP3    | Target-U |
| 189 | CSF2     | FALSE | CSF2     | Target-U |
| 190 | PTH      | FALSE | PTH      | Target-U |
| 191 | PPBP     | FALSE | PPBP     | Target-U |
| 192 | MMP11    | FALSE | MMP11    | Target-U |
| 193 | ALDH1A1  | FALSE | ALDH1A1  | Target-U |
| 194 | PECAM1   | FALSE | PECAM1   | Target-U |
| 195 | CP       | FALSE | CP       | Target-U |
| 196 | THBS2    | FALSE | THBS2    | Target-U |
| 197 | TMEFF2   | FALSE | TMEFF2   | Target-U |
| 198 | LGALS3   | FALSE | LGALS3   | Target-U |
| 199 | RGS7     | FALSE | RGS7     | Target-U |
| 200 | IL4      | FALSE | IL4      | Target-U |
| 201 | ADCY10   | FALSE | ADCY10   | Target-U |
| 202 | EREG     | FALSE | EREG     | Target-U |
| 203 | PLA2G2A  | FALSE | PLA2G2A  | Target-U |
| 204 | LDHC     | FALSE | LDHC     | Target-U |
| 205 | PPIG     | FALSE | PPIG     | Target-U |
| 206 | ACOT7    | FALSE | ACOT7    | Target-U |
| 207 | MANF     | FALSE | MANF     | Target-U |
| 208 | WISP2    | FALSE | WISP2    | Target-U |
| 209 | CLDN1    | FALSE | CLDN1    | Target-U |
| 210 | CCL11    | FALSE | CCL11    | Target-U |
| 211 | MYLK     | FALSE | MYLK     | Target-U |
| 212 | SHC1     | FALSE | SHC1     | Target-U |
| 213 | SDHB     | FALSE | SDHB     | Target-U |
| 214 | NFASC    | FALSE | NFASC    | Target-U |
| 215 | CUL2     | FALSE | CUL2     | Target-U |
| 216 | GPER     | FALSE | GPER     | Target-U |
| 217 | ECM2     | FALSE | ECM2     | Target-U |
| 218 | NCOR2    | FALSE | NCOR2    | Target-U |
| 219 | RAD51    | FALSE | RAD51    | Target-U |
| 220 | GNAI1    | FALSE | GNAI1    | Target-U |
| 221 | WT1      | FALSE | WT1      | Target-U |

|     |          |       |          |          |
|-----|----------|-------|----------|----------|
| 222 | AGER     | FALSE | AGER     | Target-U |
| 223 | PPP4C    | FALSE | PPP4C    | Target-U |
| 224 | IGFBP7   | FALSE | IGFBP7   | Target-U |
| 225 | RORA     | FALSE | RORA     | Target-U |
| 226 | SEMA5A   | FALSE | SEMA5A   | Target-U |
| 227 | KIAA1715 | FALSE | KIAA1715 | Target-U |
| 228 | TEK      | FALSE | TEK      | Target-U |
| 229 | LTBP2    | FALSE | LTBP2    | Target-U |
| 230 | LGALS1   | FALSE | LGALS1   | Target-U |
| 231 | PDCD6    | FALSE | PDCD6    | Target-U |
| 232 | GPLD1    | FALSE | GPLD1    | Target-U |
| 233 | CUX1     | FALSE | CUX1     | Target-U |
| 234 | NBR1     | FALSE | NBR1     | Target-U |
| 235 | TYMP     | FALSE | TYMP     | Target-U |
| 236 | IL1RN    | FALSE | IL1RN    | Target-U |
| 237 | MCM8     | FALSE | MCM8     | Target-U |
| 238 | AKT1     | FALSE | AKT1     | Target-U |
| 239 | TRIB3    | FALSE | TRIB3    | Target-U |
| 240 | LPA      | FALSE | LPA      | Target-U |
| 241 | ADC      | FALSE | ADC      | Target-U |
| 242 | CSF2RB   | FALSE | CSF2RB   | Target-U |
| 243 | GNRHR2   | FALSE | GNRHR2   | Target-U |
| 244 | COCH     | FALSE | COCH     | Target-U |
| 245 | VIPR1    | FALSE | VIPR1    | Target-U |
| 246 | HOXA11   | FALSE | HOXA11   | Target-U |
| 247 | NF2      | FALSE | NF2      | Target-U |
| 248 | AGRP     | FALSE | AGRP     | Target-U |
| 249 | PSMC3IP  | FALSE | PSMC3IP  | Target-U |
| 250 | ZNF382   | FALSE | ZNF382   | Target-U |
| 251 | MYCBP    | FALSE | MYCBP    | Target-U |
| 252 | ITGB1    | FALSE | ITGB1    | Target-U |
| 253 | SERPINA7 | FALSE | SERPINA7 | Target-U |
| 254 | HIST1H3A | FALSE | HIST1H3A | Target-U |
| 255 | SLC2A9   | FALSE | SLC2A9   | Target-U |
| 256 | TDGF1    | FALSE | TDGF1    | Target-U |
| 257 | LTA      | FALSE | LTA      | Target-U |
| 258 | PLP1     | FALSE | PLP1     | Target-U |
| 259 | POTED    | FALSE | POTED    | Target-U |
| 260 | TWF1     | FALSE | TWF1     | Target-U |
| 261 | ELANE    | FALSE | ELANE    | Target-U |
| 262 | TPSAB1   | FALSE | TPSAB1   | Target-U |
| 263 | CRABP1   | FALSE | CRABP1   | Target-U |
| 264 | S100A11  | FALSE | S100A11  | Target-U |
| 265 | XRCC3    | FALSE | XRCC3    | Target-U |
| 266 | ND3      | FALSE | ND3      | Target-U |
| 267 | LPAR1    | FALSE | LPAR1    | Target-U |
| 268 | AXL      | FALSE | AXL      | Target-U |
| 269 | OCIAD2   | FALSE | OCIAD2   | Target-U |
| 270 | TMPO     | FALSE | TMPO     | Target-U |
| 271 | IL18     | FALSE | IL18     | Target-U |
| 272 | KRT18    | FALSE | KRT18    | Target-U |



|     |          |       |          |          |
|-----|----------|-------|----------|----------|
| 273 | CD36     | FALSE | CD36     | Target-U |
| 274 | DNER     | FALSE | DNER     | Target-U |
| 275 | SERPINB1 | FALSE | SERPINB1 | Target-U |
| 276 | SFRP1    | FALSE | SFRP1    | Target-U |
| 277 | EDNRA    | FALSE | EDNRA    | Target-U |
| 278 | GNRH2    | FALSE | GNRH2    | Target-U |
| 279 | AKR1B10  | FALSE | AKR1B10  | Target-U |
| 280 | PML      | FALSE | PML      | Target-U |
| 281 | KRT20    | FALSE | KRT20    | Target-U |
| 282 | FLNB     | FALSE | FLNB     | Target-U |
| 283 | FBN2     | FALSE | FBN2     | Target-U |
| 284 | EGR3     | FALSE | EGR3     | Target-U |
| 285 | GSN      | FALSE | GSN      | Target-U |
| 286 | COX5A    | FALSE | COX5A    | Target-U |
| 287 | SQSTM1   | FALSE | SQSTM1   | Target-U |
| 288 | HK2      | FALSE | HK2      | Target-U |
| 289 | KITLG    | FALSE | KITLG    | Target-U |
| 290 | PIP      | FALSE | PIP      | Target-U |
| 291 | KLF9     | FALSE | KLF9     | Target-U |
| 292 | GAPDH    | FALSE | GAPDH    | Target-U |
| 293 | LPAR3    | FALSE | LPAR3    | Target-U |
| 294 | APOE     | FALSE | APOE     | Target-U |
| 295 | ATP6V0A4 | FALSE | ATP6V0A4 | Target-U |
| 296 | GRPR     | FALSE | GRPR     | Target-U |
| 297 | PLA2G7   | FALSE | PLA2G7   | Target-U |
| 298 | MCL1     | FALSE | MCL1     | Target-U |
| 299 | CCL28    | FALSE | CCL28    | Target-U |
| 300 | SORCS2   | FALSE | SORCS2   | Target-U |
| 301 | CYTB     | FALSE | CYTB     | Target-U |
| 302 | ENPP2    | FALSE | ENPP2    | Target-U |
| 303 | GAS6     | FALSE | GAS6     | Target-U |
| 304 | WNT5B    | FALSE | WNT5B    | Target-U |
| 305 | ETS1     | FALSE | ETS1     | Target-U |
| 306 | XRCC4    | FALSE | XRCC4    | Target-U |
| 307 | PPY      | FALSE | PPY      | Target-U |
| 308 | SNORA62  | FALSE | SNORA62  | Target-U |
| 309 | FLT1     | FALSE | FLT1     | Target-U |
| 310 | EBAG9    | FALSE | EBAG9    | Target-U |
| 311 | COX10    | FALSE | COX10    | Target-U |
| 312 | FBN1     | FALSE | FBN1     | Target-U |
| 313 | DAPK1    | FALSE | DAPK1    | Target-U |
| 314 | VIP      | FALSE | VIP      | Target-U |
| 315 | KRT14    | FALSE | KRT14    | Target-U |
| 316 | LDHA     | FALSE | LDHA     | Target-U |
| 317 | CHRNA5   | FALSE | CHRNA5   | Target-U |
| 318 | ESM1     | FALSE | ESM1     | Target-U |
| 319 | SGK1     | FALSE | SGK1     | Target-U |
| 320 | NCOR1    | FALSE | NCOR1    | Target-U |
| 321 | STS      | FALSE | STS      | Target-U |
| 322 | CYP2B6   | FALSE | CYP2B6   | Target-U |
| 323 | RRS1     | FALSE | RRS1     | Target-U |

|     |           |       |           |          |
|-----|-----------|-------|-----------|----------|
| 324 | NPPA      | FALSE | NPPA      | Target-U |
| 325 | PPP2R3A   | FALSE | PPP2R3A   | Target-U |
| 326 | MYOZ2     | FALSE | MYOZ2     | Target-U |
| 327 | LPAR2     | FALSE | LPAR2     | Target-U |
| 328 | MEST      | FALSE | MEST      | Target-U |
| 329 | GRB2      | FALSE | GRB2      | Target-U |
| 330 | IGKV2D-24 | FALSE | IGKV2D-24 | Target-U |
| 331 | FAM215A   | FALSE | FAM215A   | Target-U |
| 332 | CDKN1C    | FALSE | CDKN1C    | Target-U |
| 333 | PLAG1     | FALSE | PLAG1     | Target-U |
| 334 | TNRC6B    | FALSE | TNRC6B    | Target-U |
| 335 | TIPRL     | FALSE | TIPRL     | Target-U |
| 336 | MMP8      | FALSE | MMP8      | Target-U |
| 337 | MIB1      | FALSE | MIB1      | Target-U |
| 338 | DUT       | FALSE | DUT       | Target-U |
| 339 | EDN3      | FALSE | EDN3      | Target-U |
| 340 | HTLVR     | FALSE | HTLVR     | Target-U |
| 341 | COL3A1    | FALSE | COL3A1    | Target-U |
| 342 | BCHE      | FALSE | BCHE      | Target-U |
| 343 | PC        | FALSE | PC        | Target-U |
| 344 | MAPK3     | FALSE | MAPK3     | Target-U |
| 345 | ADIPOQ    | FALSE | ADIPOQ    | Target-U |
| 346 | ATP8A2    | FALSE | ATP8A2    | Target-U |
| 347 | KLF11     | FALSE | KLF11     | Target-U |
| 348 | VIPR2     | FALSE | VIPR2     | Target-U |
| 349 | FLG2      | FALSE | FLG2      | Target-U |
| 350 | LIF       | FALSE | LIF       | Target-U |
| 351 | MUC1      | FALSE | MUC1      | Target-U |
| 352 | BAK1      | FALSE | BAK1      | Target-U |
| 353 | DPT       | FALSE | DPT       | Target-U |
| 354 | KRAS      | FALSE | KRAS      | Target-U |
| 355 | TPO       | FALSE | TPO       | Target-U |
| 356 | ADCYAP1R1 | FALSE | ADCYAP1R1 | Target-U |
| 357 | SLC2A1    | FALSE | SLC2A1    | Target-U |
| 358 | SMUG1     | FALSE | SMUG1     | Target-U |
| 359 | BCL2L1    | FALSE | BCL2L1    | Target-U |
| 360 | CRP       | FALSE | CRP       | Target-U |
| 361 | CTGF      | FALSE | CTGF      | Target-U |
| 362 | RAD51B    | FALSE | RAD51B    | Target-U |
| 363 | HESX1     | FALSE | HESX1     | Target-U |
| 364 | EXOSC10   | FALSE | EXOSC10   | Target-U |
| 365 | PDGFRB    | FALSE | PDGFRB    | Target-U |
| 366 | RBP1      | FALSE | RBP1      | Target-U |
| 367 | GAS1      | FALSE | GAS1      | Target-U |
| 368 | CD68      | FALSE | CD68      | Target-U |
| 369 | TSC2      | FALSE | TSC2      | Target-U |
| 370 | ADM       | FALSE | ADM       | Target-U |
| 371 | GJA1      | FALSE | GJA1      | Target-U |
| 372 | JAZF1     | FALSE | JAZF1     | Target-U |
| 373 | PCYT1A    | FALSE | PCYT1A    | Target-U |
| 374 | HMGA1     | FALSE | HMGA1     | Target-U |

|     |          |       |          |          |
|-----|----------|-------|----------|----------|
| 375 | HSD17B1  | FALSE | HSD17B1  | Target-U |
| 376 | IGF1R    | FALSE | IGF1R    | Target-U |
| 377 | DDIT3    | FALSE | DDIT3    | Target-U |
| 378 | TNFRSF1A | FALSE | TNFRSF1A | Target-U |
| 379 | HMGB1    | FALSE | HMGB1    | Target-U |
| 380 | SUZ12    | FALSE | SUZ12    | Target-U |
| 381 | IL6R     | FALSE | IL6R     | Target-U |
| 382 | DCX      | FALSE | DCX      | Target-U |
| 383 | POLR2E   | FALSE | POLR2E   | Target-U |
| 384 | IL1B     | FALSE | IL1B     | Target-U |
| 385 | KDR      | FALSE | KDR      | Target-U |
| 386 | PIK3R1   | FALSE | PIK3R1   | Target-U |
| 387 | EDNRB    | FALSE | EDNRB    | Target-U |
| 388 | INHA     | FALSE | INHA     | Target-U |
| 389 | CALB2    | FALSE | CALB2    | Target-U |
| 390 | IL6      | FALSE | IL6      | Target-U |
| 391 | CYP2D6   | FALSE | CYP2D6   | Target-U |
| 392 | SPHK1    | FALSE | SPHK1    | Target-U |
| 393 | TIMP1    | FALSE | TIMP1    | Target-U |
| 394 | PTHLH    | FALSE | PTHLH    | Target-U |
| 395 | NES      | FALSE | NES      | Target-U |
| 396 | CCNA2    | FALSE | CCNA2    | Target-U |
| 397 | S100A1   | FALSE | S100A1   | Target-U |
| 398 | CYP26A1  | FALSE | CYP26A1  | Target-U |
| 399 | COL1A1   | FALSE | COL1A1   | Target-U |
| 400 | KRT7     | FALSE | KRT7     | Target-U |
| 401 | FUS      | FALSE | FUS      | Target-U |
| 402 | MAP3K12  | FALSE | MAP3K12  | Target-U |
| 403 | GFAP     | FALSE | GFAP     | Target-U |
| 404 | EPAS1    | FALSE | EPAS1    | Target-U |
| 405 | NCOA3    | FALSE | NCOA3    | Target-U |
| 406 | COL4A2   | FALSE | COL4A2   | Target-U |
| 407 | TIMP2    | FALSE | TIMP2    | Target-U |
| 408 | ACE      | FALSE | ACE      | Target-U |
| 409 | NOS3     | FALSE | NOS3     | Target-U |
| 410 | IRS1     | FALSE | IRS1     | Target-U |
| 411 | PAPPA    | FALSE | PAPPA    | Target-U |
| 412 | PARP1    | FALSE | PARP1    | Target-U |
| 413 | CDKN1A   | FALSE | CDKN1A   | Target-U |
| 414 | MDM2     | FALSE | MDM2     | Target-U |
| 415 | HIF1A    | FALSE | HIF1A    | Target-U |
| 416 | IGF1     | FALSE | IGF1     | Target-U |
| 417 | ENO2     | FALSE | ENO2     | Target-U |
| 418 | THBS1    | FALSE | THBS1    | Target-U |
| 419 | KRT19    | FALSE | KRT19    | Target-U |
| 420 | COL4A6   | FALSE | COL4A6   | Target-U |
| 421 | MMP2     | FALSE | MMP2     | Target-U |
| 422 | NFKB1    | FALSE | NFKB1    | Target-U |
| 423 | MYC      | FALSE | MYC      | Target-U |
| 424 | COL4A5   | FALSE | COL4A5   | Target-U |
| 425 | CTNNBIP1 | FALSE | CTNNBIP1 | Target-U |

|     |        |       |        |          |
|-----|--------|-------|--------|----------|
| 426 | HRAS   | FALSE | HRAS   | Target-U |
| 427 | PSMD9  | FALSE | PSMD9  | Target-U |
| 428 | CFH    | FALSE | CFH    | Target-U |
| 429 | FOS    | FALSE | FOS    | Target-U |
| 430 | FGF2   | FALSE | FGF2   | Target-U |
| 431 | LMOD1  | FALSE | LMOD1  | Target-U |
| 432 | CRABP2 | FALSE | CRABP2 | Target-U |
| 433 | CDK1   | FALSE | CDK1   | Target-U |
| 434 | XRCC1  | FALSE | XRCC1  | Target-U |
| 435 | LCN2   | FALSE | LCN2   | Target-U |
| 436 | RAPH1  | FALSE | RAPH1  | Target-U |
| 437 | CCL2   | FALSE | CCL2   | Target-U |
| 438 | EDN1   | FALSE | EDN1   | Target-U |
| 439 | MUC16  | FALSE | MUC16  | Target-U |
| 440 | MMP9   | FALSE | MMP9   | Target-U |
| 441 | CGA    | FALSE | CGA    | Target-U |
| 442 | IL8    | FALSE | IL8    | Target-U |
| 443 | MMRN1  | FALSE | MMRN1  | Target-U |
| 444 | ESRRA  | FALSE | ESRRA  | Target-U |
| 445 | HOXA10 | FALSE | HOXA10 | Target-U |
| 446 | SRC    | FALSE | SRC    | Target-U |
| 447 | CDK2   | FALSE | CDK2   | Target-U |
| 448 | CYP1A1 | FALSE | CYP1A1 | Target-U |
| 449 | MMP3   | FALSE | MMP3   | Target-U |
| 450 | COMT   | FALSE | COMT   | Target-U |
| 451 | TP63   | FALSE | TP63   | Target-U |
| 452 | DBT    | FALSE | DBT    | Target-U |
| 453 | PRL    | FALSE | PRL    | Target-U |
| 454 | MMP1   | FALSE | MMP1   | Target-U |
| 455 | CYP1B1 | FALSE | CYP1B1 | Target-U |
| 456 | MAPK1  | FALSE | MAPK1  | Target-U |
| 457 | PDGFRA | FALSE | PDGFRA | Target-U |
| 458 | IGF2   | FALSE | IGF2   | Target-U |
| 459 | MED12  | FALSE | MED12  | Target-U |
| 460 | FSHR   | FALSE | FSHR   | Target-U |
| 461 | EDEM1  | FALSE | EDEM1  | Target-U |
| 462 | CCND1  | FALSE | CCND1  | Target-U |
| 463 | TGFB3  | FALSE | TGFB3  | Target-U |
| 464 | None   | FALSE | None   | Target-U |
| 465 | SMN1   | FALSE | SMN1   | Target-U |
| 466 | MKI67  | FALSE | MKI67  | Target-U |
| 467 | MME    | FALSE | MME    | Target-U |
| 468 | EGF    | FALSE | EGF    | Target-U |
| 469 | VEGFA  | FALSE | VEGFA  | Target-U |
| 470 | PCNA   | FALSE | PCNA   | Target-U |
| 471 | CDKN2A | FALSE | CDKN2A | Target-U |
| 472 | PLOD1  | FALSE | PLOD1  | Target-U |
| 473 | S100B  | FALSE | S100B  | Target-U |
| 474 | VIM    | FALSE | VIM    | Target-U |
| 475 | ACTC1  | FALSE | ACTC1  | Target-U |
| 476 | HMGA2  | FALSE | HMGA2  | Target-U |

|     |         |       |         |          |
|-----|---------|-------|---------|----------|
| 477 | GNRH1   | FALSE | GNRH1   | Target-U |
| 478 | TP53    | FALSE | TP53    | Target-U |
| 479 | CD34    | FALSE | CD34    | Target-U |
| 480 | KIT     | FALSE | KIT     | Target-U |
| 481 | DES     | FALSE | DES     | Target-U |
| 482 | FH      | FALSE | FH      | Target-U |
| 483 | LHCGR   | FALSE | LHCGR   | Target-U |
| 484 | F2      | FALSE | F2      | Target-U |
| 485 | SLC12A3 | FALSE | SLC12A3 | Target-U |
| 486 | ORM2    | FALSE | ORM2    | Target-U |
| 487 | SCN4A   | FALSE | SCN4A   | Target-U |
| 488 | EGFR    | FALSE | EGFR    | Target-U |
| 489 | SCN9A   | FALSE | SCN9A   | Target-U |
| 490 | SCN10A  | FALSE | SCN10A  | Target-U |
| 491 | ADRA2C  | FALSE | ADRA2C  | Target-U |
| 492 | DRD4    | FALSE | DRD4    | Target-U |
| 493 | DRD3    | FALSE | DRD3    | Target-U |
| 494 | NPR1    | FALSE | NPR1    | Target-U |
| 495 | S100A7  | FALSE | S100A7  | Target-U |
| 496 | GP1BA   | FALSE | GP1BA   | Target-U |
| 497 | PPARA   | FALSE | PPARA   | Target-U |
| 498 | CFTR    | FALSE | CFTR    | Target-U |
| 499 | PPARG   | FALSE | PPARG   | Target-U |
| 500 | FABP2   | FALSE | FABP2   | Target-U |
| 501 | THBD    | FALSE | THBD    | Target-U |
| 502 | TNF     | FALSE | TNF     | Target-U |
| 503 | SIGMAR1 | FALSE | SIGMAR1 | Target-U |
| 504 | PGRMC1  | FALSE | PGRMC1  | Target-U |
| 505 | SLC6A3  | FALSE | SLC6A3  | Target-U |
| 506 | SRD5A3  | FALSE | SRD5A3  | Target-U |
| 507 | SRD5A2  | FALSE | SRD5A2  | Target-U |
| 508 | SRD5A1  | FALSE | SRD5A1  | Target-U |
| 509 | CYP11B2 | FALSE | CYP11B2 | Target-U |
| 510 | KLK3    | FALSE | KLK3    | Target-U |
| 511 | PIK3CD  | FALSE | PIK3CD  | Target-U |
| 512 | CYP19A1 | FALSE | CYP19A1 | Target-U |
| 513 | PTGDR2  | FALSE | PTGDR2  | Target-U |
| 514 | PTGER1  | FALSE | PTGER1  | Target-U |
| 515 | PPP2CA  | FALSE | PPP2CA  | Target-U |
| 516 | PPP2CB  | FALSE | PPP2CB  | Target-U |
| 517 | DGKA    | FALSE | DGKA    | Target-U |
| 518 | ALOX5   | FALSE | ALOX5   | Target-U |
| 519 | PRKCB   | FALSE | PRKCB   | Target-U |
| 520 | NR1I2   | FALSE | NR1I2   | Target-U |
| 521 | SEC14L2 | FALSE | SEC14L2 | Target-U |
| 522 | SEC14L3 | FALSE | SEC14L3 | Target-U |
| 523 | SEC14L4 | FALSE | SEC14L4 | Target-U |
| 524 | IDH1    | FALSE | IDH1    | Target-U |
| 525 | NTRK3   | FALSE | NTRK3   | Target-U |
| 526 | NTRK2   | FALSE | NTRK2   | Target-U |
| 527 | NTRK1   | FALSE | NTRK1   | Target-U |

|     |                 |       |                 |            |
|-----|-----------------|-------|-----------------|------------|
| 528 | HTR2B           | FALSE | HTR2B           | Target-U   |
| 529 | HTR2C           | FALSE | HTR2C           | Target-U   |
| 530 | HTR1F           | FALSE | HTR1F           | Target-U   |
| 531 | DRD5            | FALSE | DRD5            | Target-U   |
| 532 | SLC6A2          | FALSE | SLC6A2          | Target-U   |
| 533 | ADRA2B          | FALSE | ADRA2B          | Target-U   |
| 534 | ADRA2A          | FALSE | ADRA2A          | Target-U   |
| 535 | HTR1B           | FALSE | HTR1B           | Target-U   |
| 536 | HTR1D           | FALSE | HTR1D           | Target-U   |
| 537 | PTGER4          | FALSE | PTGER4          | Target-U   |
| 538 | PTGER2          | FALSE | PTGER2          | Target-U   |
| 539 | PTGER3          | FALSE | PTGER3          | Target-U   |
| 540 | ESR2            | FALSE | ESR2            | Target-U   |
| 541 | SHBG            | FALSE | SHBG            | Target-U   |
| 542 | AR              | FALSE | AR              | Target-U   |
| 543 | NR3C1           | FALSE | NR3C1           | Target-U   |
| 544 | ORM1            | FALSE | ORM1            | Target-U   |
| 545 | OPRK1           | FALSE | OPRK1           | Target-U   |
| 546 | CYP17A1         | FALSE | CYP17A1         | Target-U   |
| 547 | ESR1            | FALSE | ESR1            | Target-U   |
| 548 | ADRB1           | FALSE | ADRB1           | Target-U   |
| 549 | ADRB3           | FALSE | ADRB3           | Target-U   |
| 550 | GNRHR           | FALSE | GNRHR           | Target-U   |
| 551 | OXT             | FALSE | OXT             | Target-U   |
| 552 | OXTR            | FALSE | OXTR            | Target-U   |
| 553 | Uterine Fibroid | FALSE | Uterine Fibroid | Disease    |
| 554 | FDPS            | FALSE | FDPS            | Target-X   |
| 555 | HTR1A           | FALSE | HTR1A           | Target-X+U |
| 556 | SLC18A2         | FALSE | SLC18A2         | Target-X   |
| 557 | SLC12A4         | FALSE | SLC12A4         | Target-X   |
| 558 | SLC12A1         | FALSE | SLC12A1         | Target-X   |
| 559 | SLC12A6         | FALSE | SLC12A6         | Target-X   |
| 560 | SLC12A5         | FALSE | SLC12A5         | Target-X   |
| 561 | SLC12A7         | FALSE | SLC12A7         | Target-X   |
| 562 | SLC12A2         | FALSE | SLC12A2         | Target-X   |
| 563 | CHRN4           | FALSE | CHRN4           | Target-X   |
| 564 | CHRN2           | FALSE | CHRN2           | Target-X   |
| 565 | CHRNA3          | FALSE | CHRNA3          | Target-X   |
| 566 | P2RX3           | FALSE | P2RX3           | Target-X   |
| 567 | P2RX2           | FALSE | P2RX2           | Target-X   |
| 568 | KCNMA1          | FALSE | KCNMA1          | Target-X   |
| 569 | DMTN            | FALSE | DMTN            | Target-X   |
| 570 | FOXL2           | FALSE | FOXL2           | Target-X   |
| 571 | CACNG1          | FALSE | CACNG1          | Target-X+U |
| 572 | CACNB2          | FALSE | CACNB2          | Target-X+U |
| 573 | CACNA1C         | FALSE | CACNA1C         | Target-X+U |
| 574 | CACNA1S         | FALSE | CACNA1S         | Target-X+U |
| 575 | CACNA2D1        | FALSE | CACNA2D1        | Target-X+U |
| 576 | CACNB1          | FALSE | CACNB1          | Target-X+U |
| 577 | ATP1A1          | FALSE | ATP1A1          | Target-X   |
| 578 | TF              | FALSE | TF              | Target-X   |

|     |                |       |                |            |
|-----|----------------|-------|----------------|------------|
| 579 | NR3C2          | FALSE | NR3C2          | Target-X+U |
| 580 | DRD2           | FALSE | DRD2           | Target-X+U |
| 581 | ADRA1D         | FALSE | ADRA1D         | Target-X+U |
| 582 | ACHE           | FALSE | ACHE           | Target-X   |
| 583 | OPRD1          | FALSE | OPRD1          | Target-X   |
| 584 | CA2            | FALSE | CA2            | Target-X   |
| 585 | CHRM5          | FALSE | CHRM5          | Target-X   |
| 586 | RXRA           | FALSE | RXRA           | Target-X+U |
| 587 | MAP2           | FALSE | MAP2           | Target-X   |
| 588 | PON1           | FALSE | PON1           | Target-X+U |
| 589 | TGFB1          | FALSE | TGFB1          | Target-X+U |
| 590 | PRKCA          | FALSE | PRKCA          | Target-X+U |
| 591 | CASP8          | FALSE | CASP8          | Target-X   |
| 592 | CASP3          | FALSE | CASP3          | Target-X+U |
| 593 | JUN            | FALSE | JUN            | Target-X+U |
| 594 | CASP9          | FALSE | CASP9          | Target-X+U |
| 595 | BAX            | FALSE | BAX            | Target-X+U |
| 596 | BCL2           | FALSE | BCL2           | Target-X+U |
| 597 | CYP101A1       | FALSE | CYP101A1       | Target-X   |
| 598 | CHRNA7         | FALSE | CHRNA7         | Target-X   |
| 599 | GABRA1         | FALSE | GABRA1         | Target-X   |
| 600 | OPRM1          | FALSE | OPRM1          | Target-X   |
| 601 | SLC6A4         | FALSE | SLC6A4         | Target-X+U |
| 602 | CHRNA2         | FALSE | CHRNA2         | Target-X   |
| 603 | ADRB2          | FALSE | ADRB2          | Target-X+U |
| 604 | ADRA1B         | FALSE | ADRA1B         | Target-X+U |
| 605 | CHRM2          | FALSE | CHRM2          | Target-X   |
| 606 | GABRA3         | FALSE | GABRA3         | Target-X   |
| 607 | ADRA1A         | FALSE | ADRA1A         | Target-X+U |
| 608 | GABRA5         | FALSE | GABRA5         | Target-X   |
| 609 | HTR2A          | FALSE | HTR2A          | Target-X+U |
| 610 | PDE3A          | FALSE | PDE3A          | Target-X   |
| 611 | CHRM4          | FALSE | CHRM4          | Target-X   |
| 612 | GABRA2         | FALSE | GABRA2         | Target-X   |
| 613 | SCN5A          | FALSE | SCN5A          | Target-X+U |
| 614 | CHRM1          | FALSE | CHRM1          | Target-X   |
| 615 | CHRM3          | FALSE | CHRM3          | Target-X   |
| 616 | DRD1           | FALSE | DRD1           | Target-X+U |
| 617 | PRKACA         | FALSE | PRKACA         | Target-X   |
| 618 | KCNH2          | FALSE | KCNH2          | Target-X   |
| 619 | PIK3CG         | FALSE | PIK3CG         | Target-X+U |
| 620 | HSP90AB1       | FALSE | HSP90AB1       | Target-X   |
| 621 | PTGS2          | FALSE | PTGS2          | Target-X+U |
| 622 | PTGS1          | FALSE | PTGS1          | Target-X+U |
| 623 | NCOA2          | FALSE | NCOA2          | Target-X+U |
| 624 | PGR            | FALSE | PGR            | Target-X+U |
| 625 | Peiminoside qt | FALSE | Peiminoside qt | Compound   |
| 626 | Peiminoside    | FALSE | Peiminoside    | Compound   |
| 627 | Peiminine      | FALSE | Peiminine      | Compound   |
| 628 | Chaksine       | FALSE | Chaksine       | Compound   |
| 629 | OSI-2040       | FALSE | OSI-2040       | Compound   |

|     |                                                                               |       |                                                                               |            |
|-----|-------------------------------------------------------------------------------|-------|-------------------------------------------------------------------------------|------------|
| 630 | Solatubin                                                                     | FALSE | Solatubin                                                                     | Compound   |
| 631 | 6-Methoxyl-2-acetyl-3-methyl-1,4-naphthoquinone-8-O-beta-D-glucopyranoside_qt | FALSE | 6-Methoxyl-2-acetyl-3-methyl-1,4-naphthoquinone-8-O-beta-D-glucopyranoside_qt | Compound   |
| 632 | 6-Methoxyl-2-acetyl-3-methyl-1,4-naphthoquinone-8-O-beta-D-glucopyranoside    | FALSE | 6-Methoxyl-2-acetyl-3-methyl-1,4-naphthoquinone-8-O-beta-D-glucopyranoside    | Compound   |
| 633 | Verticine                                                                     | FALSE | Verticine                                                                     | Compound   |
| 634 | Ziebeimine                                                                    | FALSE | Ziebeimine                                                                    | Compound   |
| 635 | Zhebeiresinol                                                                 | FALSE | Zhebeiresinol                                                                 | Compound-E |
| 636 | Pelargonidin-3,5-diglucoside                                                  | FALSE | Pelargonidin-3,5-diglucoside                                                  | Compound   |
| 637 | Peimisine                                                                     | FALSE | Peimisine                                                                     | Compound   |
| 638 | syringaresinol                                                                | FALSE | syringaresinol                                                                | Compound   |
| 639 | 2,5-Dimethoxybenzoquinone                                                     | FALSE | 2,5-Dimethoxybenzoquinone                                                     | Compound   |
| 640 | pelargonidin                                                                  | FALSE | pelargonidin                                                                  | Compound   |
| 641 | Zhebeimu                                                                      | FALSE | Zhebeimu                                                                      | Herb       |
| 642 | Cedrol                                                                        | FALSE | Cedrol                                                                        | Compound   |
| 643 | cistanoside D                                                                 | FALSE | cistanoside D                                                                 | Compound   |
| 644 | 7-hydroxy-9-hydroxymethyl-3-oxo-                                              | FALSE | 7-hydroxy-9-hydroxymethyl-3-oxo-                                              | Compound   |
| 645 | harpagide                                                                     | FALSE | harpagide                                                                     | Compound   |
| 646 | 6-O-methylcatapol_qt                                                          | FALSE | 6-O-methylcatapol_qt                                                          | Compound   |
| 647 | 6-O-methylcatapol                                                             | FALSE | 6-O-methylcatapol                                                             | Compound   |
| 648 | 6'-O-cinnamoylharpagirle_qt 2                                                 | FALSE | 6'-O-cinnamoylharpagirle_qt 2                                                 | Compound   |
| 649 | 6'-O-cinnamoylharpagirle                                                      | FALSE | 6'-O-cinnamoylharpagirle                                                      | Compound   |
| 650 | 5-(methylthio)valeronitrile                                                   | FALSE | 5-(methylthio)valeronitrile                                                   | Compound   |
| 651 | geniposide_qt                                                                 | FALSE | geniposide_qt                                                                 | Compound   |
| 652 | geniposide                                                                    | FALSE | geniposide                                                                    | Compound   |
| 653 | catapol                                                                       | FALSE | catapol                                                                       | Compound   |
| 654 | harpagoside_qt                                                                | FALSE | harpagoside_qt                                                                | Compound   |
| 655 | harpagoside                                                                   | FALSE | harpagoside                                                                   | Compound   |
| 656 | scropolioside D_qt                                                            | FALSE | scropolioside D_qt                                                            | Compound   |
| 657 | scropolioside D                                                               | FALSE | scropolioside D                                                               | Compound   |
| 658 | 14-deoxy-12(R)-sulfoandrographolide                                           | FALSE | 14-deoxy-12(R)-sulfoandrographolide                                           | Compound   |
| 659 | scropolioside A_qt                                                            | FALSE | scropolioside A_qt                                                            | Compound   |



|     |                                    |       |                                    |            |
|-----|------------------------------------|-------|------------------------------------|------------|
| 660 | scropolioside A                    | FALSE | scropolioside A                    | Compound   |
| 661 | angroside C                        | FALSE | angroside C                        | Compound   |
| 662 | HMF                                | FALSE | HMF                                | Compound   |
| 663 | Homovanillyl alcohol               | FALSE | Homovanillyl alcohol               | Compound   |
| 664 | paeoniflorin                       | FALSE | paeoniflorin                       | Compound   |
| 665 | oleic acid                         | FALSE | oleic acid                         | Compound   |
| 666 | aucubigenin                        | FALSE | aucubigenin                        | Compound   |
| 667 | ursolic acid                       | FALSE | ursolic acid                       | Compound   |
| 668 | Crystal VI                         | FALSE | Crystal VI                         | Compound   |
| 669 | FERULIC ACID (CIS)                 | FALSE | FERULIC ACID (CIS)                 | Compound   |
| 670 | aucubin                            | FALSE | aucubin                            | Compound   |
| 671 | FER                                | FALSE | FER                                | Compound   |
| 672 | sitosterol                         | FALSE | sitosterol                         | Compound-E |
| 673 | beta-sitosterol                    | FALSE | beta-sitosterol                    | Compound-E |
| 674 | Sitogluside                        | FALSE | Sitogluside                        | Compound   |
| 675 | lupeol                             | FALSE | lupeol                             | Compound   |
| 676 | succinic acid                      | FALSE | succinic acid                      | Compound   |
| 677 | 5-(2-hydroxyethyl)-2-methoxyphenol | FALSE | 5-(2-hydroxyethyl)-2-methoxyphenol | Compound   |
| 678 | catapol_qt                         | FALSE | catapol_qt                         | Compound   |
| 679 | cinnamic acid                      | FALSE | cinnamic acid                      | Compound   |
| 680 | caffeic acid                       | FALSE | caffeic acid                       | Compound   |
| 681 | sugiol                             | FALSE | sugiol                             | Compound-E |
| 682 | paeoniflorin_qt                    | FALSE | paeoniflorin_qt                    | Compound   |
| 683 | p-MCA                              | FALSE | p-MCA                              | Compound   |
| 684 | decaffeoylacteoside                | FALSE | decaffeoylacteoside                | Compound   |
| 685 | acteoside                          | FALSE | acteoside                          | Compound   |
| 686 | hydroxytyrosol                     | FALSE | hydroxytyrosol                     | Compound   |
| 687 | cis-Zimtsaeure                     | FALSE | cis-Zimtsaeure                     | Compound   |
| 688 | vanillic acid                      | FALSE | vanillic acid                      | Compound   |
| 689 | Xuanshen                           | FALSE | Xuanshen                           | Herb       |
| 690 | Calcium Phosphate                  | FALSE | Calcium Phosphate                  | Compound-E |
| 691 | Calcium Carbonate                  | FALSE | Calcium Carbonate                  | Compound-E |
| 692 | Silicon                            | FALSE | Silicon                            | Compound-E |
| 693 | Calcium Sulphate                   | FALSE | Calcium Sulphate                   | Compound-E |
| 694 | Aluminum                           | FALSE | Aluminum                           | Compound-E |
| 695 | Shengmulu                          | FALSE | Shengmulu                          | Herb       |

**Table S5 GO enrichment and KEGG pathway analysis about target genes in XLW-treated UFs**

| <b>Enrichment term</b>  | <b>Term ID</b> | <b>Observed gene count</b> | <b>Background gene count</b> | <b>FDR</b> |
|-------------------------|----------------|----------------------------|------------------------------|------------|
| GO cellular composition | GO:0005901     | 5                          | 74                           | 9.03E-06   |
| GO cellular composition | GO:0044459     | 15                         | 2651                         | 9.03E-06   |
| GO cellular composition | GO:0045121     | 7                          | 300                          | 9.03E-06   |
| GO cellular composition | GO:0030315     | 4                          | 45                           | 1.16E-05   |
| GO cellular composition | GO:0005887     | 11                         | 1564                         | 3.07E-05   |
| GO cellular composition | GO:0098805     | 11                         | 1554                         | 3.07E-05   |
| GO cellular composition | GO:0031674     | 4                          | 136                          | 0.00045    |
| GO cellular composition | GO:0098590     | 8                          | 1061                         | 0.00053    |
| GO cellular composition | GO:1990454     | 2                          | 6                            | 0.0006     |
| GO cellular composition | GO:0005886     | 16                         | 5159                         | 0.0011     |
| GO cellular composition | GO:0044425     | 18                         | 6517                         | 0.0011     |
| GO cellular composition | GO:0016020     | 20                         | 8420                         | 0.0017     |
| GO cellular composition | GO:0031090     | 12                         | 3337                         | 0.0029     |
| GO cellular composition | GO:0098797     | 5                          | 502                          | 0.0032     |
| GO cellular composition | GO:0030018     | 3                          | 122                          | 0.0041     |
| GO cellular composition | GO:0043229     | 23                         | 12193                        | 0.0069     |
| GO cellular composition | GO:0012505     | 13                         | 4347                         | 0.0077     |
| GO cellular composition | GO:0098796     | 6                          | 1047                         | 0.0112     |
| GO cellular composition | GO:0016328     | 2                          | 55                           | 0.0144     |
| GO cellular composition | GO:0034703     | 3                          | 206                          | 0.0144     |
| GO cellular composition | GO:0032991     | 13                         | 4792                         | 0.0159     |
| GO cellular composition | GO:0044422     | 19                         | 9111                         | 0.0159     |
| GO cellular composition | GO:0005622     | 24                         | 14286                        | 0.0212     |
| GO cellular composition | GO:0005737     | 21                         | 11238                        | 0.0247     |
| GO cellular composition | GO:0043227     | 21                         | 11244                        | 0.0247     |
| GO cellular composition | GO:0016021     | 13                         | 5155                         | 0.0264     |
| GO cellular composition | GO:0060170     | 2                          | 85                           | 0.0264     |
| GO cellular composition | GO:0005783     | 7                          | 1796                         | 0.0277     |
| GO cellular composition | GO:0043235     | 3                          | 305                          | 0.03       |
| GO cellular composition | GO:0005789     | 5                          | 1022                         | 0.0354     |
| GO cellular composition | GO:0097458     | 6                          | 1449                         | 0.0354     |
| GO cellular composition | GO:0098827     | 5                          | 1025                         | 0.0354     |
| GO cellular composition | GO:0044464     | 25                         | 16244                        | 0.0363     |
| GO cellular composition | GO:0097730     | 2                          | 128                          | 0.0432     |
| GO cellular composition | GO:0044444     | 18                         | 9377                         | 0.0464     |
| GO cellular composition | GO:0031967     | 5                          | 1146                         | 0.0474     |
| GO cellular composition | GO:0043005     | 5                          | 1142                         | 0.0474     |
| GO molecular function   | GO:0008227     | 6                          | 48                           | 1.59E-08   |
| GO molecular function   | GO:0004935     | 4                          | 10                           | 2.90E-07   |
| GO molecular function   | GO:0070405     | 5                          | 66                           | 2.57E-06   |
| GO molecular function   | GO:0004937     | 3                          | 3                            | 2.59E-06   |
| GO molecular function   | GO:0046983     | 11                         | 1301                         | 1.02E-05   |
| GO molecular function   | GO:0038023     | 11                         | 1429                         | 2.24E-05   |
| GO molecular function   | GO:0005515     | 20                         | 6605                         | 9.07E-05   |
| GO molecular function   | GO:1901338     | 3                          | 20                           | 9.07E-05   |
| GO molecular function   | GO:0004930     | 8                          | 824                          | 0.00015    |
| GO molecular function   | GO:0004666     | 2                          | 2                            | 0.00022    |

|                       |            |    |       |          |
|-----------------------|------------|----|-------|----------|
| GO molecular function | GO:0030594 | 4  | 107   | 0.00025  |
| GO molecular function | GO:0046982 | 6  | 519   | 0.00083  |
| GO molecular function | GO:0003707 | 3  | 59    | 0.0012   |
| GO molecular function | GO:0042803 | 7  | 830   | 0.0012   |
| GO molecular function | GO:0097200 | 2  | 10    | 0.0017   |
| GO molecular function | GO:0004952 | 2  | 12    | 0.0018   |
| GO molecular function | GO:0008331 | 2  | 11    | 0.0018   |
| GO molecular function | GO:0051378 | 2  | 11    | 0.0018   |
| GO molecular function | GO:0035240 | 2  | 13    | 0.002    |
| GO molecular function | GO:0043169 | 14 | 4170  | 0.002    |
| GO molecular function | GO:0050998 | 2  | 13    | 0.002    |
| GO molecular function | GO:0019899 | 10 | 2197  | 0.0022   |
| GO molecular function | GO:0042802 | 9  | 1754  | 0.0022   |
| GO molecular function | GO:0004993 | 2  | 22    | 0.0041   |
| GO molecular function | GO:0005102 | 8  | 1513  | 0.0041   |
| GO molecular function | GO:0005488 | 23 | 11878 | 0.0048   |
| GO molecular function | GO:0004601 | 2  | 40    | 0.0109   |
| GO molecular function | GO:0008289 | 5  | 673   | 0.0115   |
| GO molecular function | GO:0019904 | 5  | 706   | 0.0132   |
| GO molecular function | GO:0004879 | 2  | 50    | 0.0138   |
| GO molecular function | GO:0005244 | 3  | 198   | 0.0138   |
| GO molecular function | GO:0005516 | 3  | 194   | 0.0138   |
| GO molecular function | GO:0015459 | 2  | 51    | 0.0138   |
| GO molecular function | GO:0046873 | 4  | 458   | 0.016    |
| GO molecular function | GO:0015267 | 4  | 461   | 0.0161   |
| GO molecular function | GO:0005496 | 2  | 88    | 0.0324   |
| GO molecular function | GO:0051213 | 2  | 88    | 0.0324   |
| GO molecular function | GO:0044877 | 5  | 968   | 0.0363   |
| GO molecular function | GO:0005261 | 3  | 316   | 0.0383   |
| GO molecular function | GO:0097159 | 13 | 5382  | 0.0407   |
| GO molecular function | GO:0016922 | 2  | 111   | 0.0418   |
| GO molecular function | GO:0022857 | 5  | 1049  | 0.0429   |
| GO biological process | GO:0008015 | 14 | 373   | 9.39E-15 |
| GO biological process | GO:0003018 | 10 | 162   | 4.78E-12 |
| GO biological process | GO:0097746 | 9  | 129   | 3.58E-11 |
| GO biological process | GO:0097756 | 7  | 39    | 4.00E-11 |
| GO biological process | GO:0043269 | 12 | 618   | 1.02E-09 |
| GO biological process | GO:0042310 | 6  | 31    | 1.20E-09 |
| GO biological process | GO:0014070 | 13 | 873   | 2.04E-09 |
| GO biological process | GO:0003008 | 16 | 1827  | 6.22E-09 |
| GO biological process | GO:0010033 | 18 | 2815  | 2.28E-08 |
| GO biological process | GO:0071407 | 10 | 505   | 5.24E-08 |
| GO biological process | GO:0090257 | 8  | 224   | 5.24E-08 |
| GO biological process | GO:0010959 | 9  | 360   | 5.98E-08 |
| GO biological process | GO:0044057 | 10 | 516   | 5.98E-08 |
| GO biological process | GO:0051716 | 23 | 6212  | 6.77E-08 |
| GO biological process | GO:0042221 | 20 | 4153  | 7.60E-08 |
| GO biological process | GO:1903522 | 8  | 249   | 8.25E-08 |
| GO biological process | GO:0007204 | 8  | 251   | 8.36E-08 |
| GO biological process | GO:0006874 | 9  | 388   | 8.64E-08 |
| GO biological process | GO:0006937 | 7  | 156   | 1.05E-07 |

|                       |            |    |      |          |
|-----------------------|------------|----|------|----------|
| GO biological process | GO:0045907 | 5  | 33   | 1.06E-07 |
| GO biological process | GO:0001993 | 4  | 9    | 1.27E-07 |
| GO biological process | GO:0009719 | 13 | 1353 | 1.66E-07 |
| GO biological process | GO:0008217 | 7  | 177  | 1.78E-07 |
| GO biological process | GO:0023052 | 21 | 5108 | 1.78E-07 |
| GO biological process | GO:0007188 | 7  | 183  | 2.09E-07 |
| GO biological process | GO:0071495 | 12 | 1106 | 2.09E-07 |
| GO biological process | GO:0051049 | 14 | 1732 | 2.21E-07 |
| GO biological process | GO:0007154 | 21 | 5219 | 2.33E-07 |
| GO biological process | GO:0050896 | 24 | 7824 | 2.72E-07 |
| GO biological process | GO:0042493 | 11 | 900  | 3.06E-07 |
| GO biological process | GO:0048545 | 8  | 324  | 3.10E-07 |
| GO biological process | GO:0007200 | 6  | 109  | 3.33E-07 |
| GO biological process | GO:0065008 | 18 | 3559 | 3.53E-07 |
| GO biological process | GO:0051282 | 6  | 113  | 3.73E-07 |
| GO biological process | GO:0050801 | 10 | 708  | 4.17E-07 |
| GO biological process | GO:0035556 | 13 | 1528 | 4.45E-07 |
| GO biological process | GO:0032225 | 4  | 17   | 5.96E-07 |
| GO biological process | GO:0071880 | 4  | 17   | 5.96E-07 |
| GO biological process | GO:0042127 | 13 | 1594 | 6.81E-07 |
| GO biological process | GO:0006940 | 5  | 60   | 7.81E-07 |
| GO biological process | GO:0006936 | 7  | 244  | 8.66E-07 |
| GO biological process | GO:0050805 | 5  | 62   | 8.66E-07 |
| GO biological process | GO:0032501 | 22 | 6507 | 9.18E-07 |
| GO biological process | GO:0007267 | 11 | 1073 | 1.19E-06 |
| GO biological process | GO:0042391 | 8  | 408  | 1.19E-06 |
| GO biological process | GO:0009410 | 7  | 262  | 1.26E-06 |
| GO biological process | GO:0033993 | 10 | 825  | 1.28E-06 |
| GO biological process | GO:0009725 | 10 | 854  | 1.71E-06 |
| GO biological process | GO:0034765 | 8  | 434  | 1.74E-06 |
| GO biological process | GO:1901700 | 12 | 1427 | 1.75E-06 |
| GO biological process | GO:0001994 | 3  | 4    | 2.15E-06 |
| GO biological process | GO:0010604 | 16 | 3081 | 2.33E-06 |
| GO biological process | GO:1904062 | 7  | 294  | 2.33E-06 |
| GO biological process | GO:0007165 | 19 | 4738 | 2.40E-06 |
| GO biological process | GO:0042592 | 12 | 1491 | 2.50E-06 |
| GO biological process | GO:0032270 | 12 | 1496 | 2.56E-06 |
| GO biological process | GO:0009636 | 8  | 468  | 2.60E-06 |
| GO biological process | GO:0070887 | 15 | 2672 | 2.75E-06 |
| GO biological process | GO:0048518 | 20 | 5459 | 2.80E-06 |
| GO biological process | GO:0007189 | 5  | 88   | 3.10E-06 |
| GO biological process | GO:0050804 | 7  | 316  | 3.32E-06 |
| GO biological process | GO:0001659 | 4  | 33   | 3.69E-06 |
| GO biological process | GO:0003073 | 5  | 92   | 3.69E-06 |
| GO biological process | GO:0045987 | 4  | 33   | 3.69E-06 |
| GO biological process | GO:0048522 | 19 | 4898 | 3.69E-06 |
| GO biological process | GO:0006811 | 11 | 1292 | 5.22E-06 |
| GO biological process | GO:0007610 | 8  | 541  | 6.43E-06 |
| GO biological process | GO:0043279 | 5  | 106  | 6.43E-06 |
| GO biological process | GO:0007613 | 5  | 109  | 7.17E-06 |
| GO biological process | GO:0009628 | 10 | 1052 | 7.81E-06 |

|                       |            |    |       |          |
|-----------------------|------------|----|-------|----------|
| GO biological process | GO:0001932 | 11 | 1370  | 8.64E-06 |
| GO biological process | GO:0072359 | 9  | 807   | 9.25E-06 |
| GO biological process | GO:0051924 | 6  | 236   | 1.09E-05 |
| GO biological process | GO:0007611 | 6  | 237   | 1.10E-05 |
| GO biological process | GO:0032355 | 5  | 126   | 1.29E-05 |
| GO biological process | GO:0050806 | 5  | 126   | 1.29E-05 |
| GO biological process | GO:0006939 | 4  | 51    | 1.44E-05 |
| GO biological process | GO:0043270 | 6  | 252   | 1.50E-05 |
| GO biological process | GO:0071310 | 13 | 2219  | 1.51E-05 |
| GO biological process | GO:0010243 | 9  | 876   | 1.65E-05 |
| GO biological process | GO:0009314 | 7  | 425   | 1.68E-05 |
| GO biological process | GO:0009605 | 12 | 1857  | 1.77E-05 |
| GO biological process | GO:0051050 | 9  | 892   | 1.87E-05 |
| GO biological process | GO:0019932 | 6  | 266   | 1.92E-05 |
| GO biological process | GO:1903169 | 5  | 146   | 2.34E-05 |
| GO biological process | GO:0051966 | 4  | 61    | 2.58E-05 |
| GO biological process | GO:0051239 | 14 | 2788  | 2.62E-05 |
| GO biological process | GO:0009416 | 6  | 290   | 3.01E-05 |
| GO biological process | GO:0060402 | 4  | 65    | 3.20E-05 |
| GO biological process | GO:0009653 | 12 | 1992  | 3.48E-05 |
| GO biological process | GO:0071417 | 7  | 485   | 3.66E-05 |
| GO biological process | GO:0032268 | 13 | 2486  | 4.84E-05 |
| GO biological process | GO:0051173 | 14 | 2946  | 4.84E-05 |
| GO biological process | GO:0055117 | 4  | 74    | 4.92E-05 |
| GO biological process | GO:0043410 | 7  | 512   | 4.94E-05 |
| GO biological process | GO:0065007 | 25 | 11740 | 5.05E-05 |
| GO biological process | GO:0051279 | 4  | 75    | 5.06E-05 |
| GO biological process | GO:0048148 | 3  | 20    | 5.53E-05 |
| GO biological process | GO:0001963 | 3  | 21    | 6.22E-05 |
| GO biological process | GO:0002028 | 4  | 82    | 6.86E-05 |
| GO biological process | GO:0031325 | 14 | 3060  | 7.07E-05 |
| GO biological process | GO:0070374 | 5  | 196   | 8.06E-05 |
| GO biological process | GO:0071383 | 5  | 197   | 8.20E-05 |
| GO biological process | GO:0032502 | 18 | 5401  | 8.35E-05 |
| GO biological process | GO:0008016 | 5  | 201   | 8.83E-05 |
| GO biological process | GO:0051588 | 4  | 92    | 9.99E-05 |
| GO biological process | GO:0097191 | 4  | 93    | 0.0001   |
| GO biological process | GO:0002027 | 4  | 95    | 0.00011  |
| GO biological process | GO:0044706 | 5  | 211   | 0.00011  |
| GO biological process | GO:0006812 | 8  | 866   | 0.00013  |
| GO biological process | GO:0008284 | 8  | 878   | 0.00014  |
| GO biological process | GO:0021761 | 4  | 101   | 0.00014  |
| GO biological process | GO:0001508 | 4  | 104   | 0.00015  |
| GO biological process | GO:0051240 | 10 | 1551  | 0.00016  |
| GO biological process | GO:0097192 | 3  | 31    | 0.00016  |
| GO biological process | GO:0021537 | 5  | 237   | 0.00018  |
| GO biological process | GO:0006816 | 5  | 242   | 0.00019  |
| GO biological process | GO:0043029 | 3  | 33    | 0.00019  |
| GO biological process | GO:0001934 | 8  | 941   | 0.00021  |
| GO biological process | GO:0010648 | 9  | 1255  | 0.00021  |
| GO biological process | GO:0023057 | 9  | 1258  | 0.00021  |

|                       |            |    |       |         |
|-----------------------|------------|----|-------|---------|
| GO biological process | GO:0030001 | 7  | 664   | 0.00021 |
| GO biological process | GO:0050789 | 24 | 11116 | 0.00021 |
| GO biological process | GO:0008285 | 7  | 669   | 0.00022 |
| GO biological process | GO:0032227 | 2  | 3     | 0.00022 |
| GO biological process | GO:0098912 | 2  | 3     | 0.00022 |
| GO biological process | GO:1903530 | 7  | 672   | 0.00022 |
| GO biological process | GO:0007568 | 5  | 255   | 0.00023 |
| GO biological process | GO:0010647 | 10 | 1631  | 0.00023 |
| GO biological process | GO:0023056 | 10 | 1638  | 0.00023 |
| GO biological process | GO:0048513 | 13 | 2926  | 0.00023 |
| GO biological process | GO:1902533 | 8  | 959   | 0.00023 |
| GO biological process | GO:0060359 | 4  | 122   | 0.00024 |
| GO biological process | GO:0060322 | 7  | 692   | 0.00026 |
| GO biological process | GO:0086010 | 3  | 42    | 0.00032 |
| GO biological process | GO:0007275 | 16 | 4726  | 0.00034 |
| GO biological process | GO:0015850 | 4  | 134   | 0.00034 |
| GO biological process | GO:0048871 | 5  | 283   | 0.00034 |
| GO biological process | GO:0071214 | 5  | 282   | 0.00034 |
| GO biological process | GO:0007507 | 6  | 485   | 0.00035 |
| GO biological process | GO:0071396 | 6  | 486   | 0.00035 |
| GO biological process | GO:0001666 | 5  | 288   | 0.00036 |
| GO biological process | GO:0010035 | 6  | 491   | 0.00036 |
| GO biological process | GO:0051384 | 4  | 138   | 0.00036 |
| GO biological process | GO:0009411 | 4  | 139   | 0.00037 |
| GO biological process | GO:0045776 | 3  | 46    | 0.00038 |
| GO biological process | GO:0086045 | 2  | 5     | 0.00038 |
| GO biological process | GO:0001505 | 5  | 295   | 0.00039 |
| GO biological process | GO:0043271 | 4  | 143   | 0.00039 |
| GO biological process | GO:0097190 | 5  | 295   | 0.00039 |
| GO biological process | GO:0048609 | 7  | 766   | 0.00042 |
| GO biological process | GO:0098900 | 3  | 48    | 0.00042 |
| GO biological process | GO:0043525 | 3  | 49    | 0.00044 |
| GO biological process | GO:0008219 | 8  | 1080  | 0.00046 |
| GO biological process | GO:0035690 | 5  | 310   | 0.00047 |
| GO biological process | GO:0021853 | 2  | 6     | 0.00048 |
| GO biological process | GO:0034349 | 2  | 6     | 0.00048 |
| GO biological process | GO:0050678 | 5  | 311   | 0.00048 |
| GO biological process | GO:0071478 | 4  | 153   | 0.00048 |
| GO biological process | GO:0071466 | 4  | 157   | 0.00052 |
| GO biological process | GO:0001101 | 5  | 323   | 0.00054 |
| GO biological process | GO:0006367 | 4  | 162   | 0.00057 |
| GO biological process | GO:0043536 | 3  | 55    | 0.00057 |
| GO biological process | GO:0008635 | 2  | 7     | 0.00058 |
| GO biological process | GO:0014062 | 2  | 7     | 0.00058 |
| GO biological process | GO:0051726 | 8  | 1129  | 0.00058 |
| GO biological process | GO:0048468 | 9  | 1493  | 0.0006  |
| GO biological process | GO:0010038 | 5  | 339   | 0.00065 |
| GO biological process | GO:0010646 | 13 | 3327  | 0.00068 |
| GO biological process | GO:0051584 | 2  | 8     | 0.00069 |
| GO biological process | GO:0060135 | 3  | 60    | 0.00069 |
| GO biological process | GO:0023051 | 13 | 3360  | 0.00074 |

|                       |            |    |      |         |
|-----------------------|------------|----|------|---------|
| GO biological process | GO:0007417 | 7  | 861  | 0.00076 |
| GO biological process | GO:0032870 | 6  | 585  | 0.00078 |
| GO biological process | GO:0097164 | 4  | 179  | 0.00078 |
| GO biological process | GO:0007565 | 4  | 180  | 0.00079 |
| GO biological process | GO:0045136 | 2  | 9    | 0.00082 |
| GO biological process | GO:0051926 | 3  | 65   | 0.00082 |
| GO biological process | GO:0019222 | 18 | 6516 | 0.00083 |
| GO biological process | GO:0051171 | 17 | 5827 | 0.00084 |
| GO biological process | GO:0051270 | 7  | 886  | 0.00086 |
| GO biological process | GO:0070588 | 4  | 189  | 0.0009  |
| GO biological process | GO:0006970 | 3  | 68   | 0.00091 |
| GO biological process | GO:0019216 | 5  | 373  | 0.00092 |
| GO biological process | GO:0030154 | 13 | 3457 | 0.00093 |
| GO biological process | GO:0030432 | 2  | 10   | 0.00093 |
| GO biological process | GO:0032025 | 2  | 10   | 0.00093 |
| GO biological process | GO:0045787 | 5  | 376  | 0.00093 |
| GO biological process | GO:0055085 | 8  | 1235 | 0.00094 |
| GO biological process | GO:0051649 | 9  | 1616 | 0.00096 |
| GO biological process | GO:0098662 | 6  | 618  | 0.00096 |
| GO biological process | GO:0007186 | 8  | 1247 | 0.00099 |
| GO biological process | GO:0006915 | 7  | 915  | 0.001   |
| GO biological process | GO:0019371 | 2  | 11   | 0.0011  |
| GO biological process | GO:0034103 | 3  | 73   | 0.0011  |
| GO biological process | GO:0044703 | 7  | 923  | 0.0011  |
| GO biological process | GO:0045760 | 2  | 11   | 0.0011  |
| GO biological process | GO:0050877 | 8  | 1271 | 0.0011  |
| GO biological process | GO:0080090 | 17 | 5982 | 0.0011  |
| GO biological process | GO:0007420 | 6  | 650  | 0.0012  |
| GO biological process | GO:0009612 | 4  | 210  | 0.0012  |
| GO biological process | GO:0015872 | 2  | 12   | 0.0012  |
| GO biological process | GO:0018958 | 3  | 78   | 0.0012  |
| GO biological process | GO:0034644 | 3  | 78   | 0.0012  |
| GO biological process | GO:0043281 | 4  | 209  | 0.0012  |
| GO biological process | GO:0048731 | 14 | 4144 | 0.0012  |
| GO biological process | GO:0031323 | 17 | 6082 | 0.0013  |
| GO biological process | GO:0043502 | 3  | 81   | 0.0013  |
| GO biological process | GO:0060158 | 2  | 13   | 0.0013  |
| GO biological process | GO:0060255 | 17 | 6072 | 0.0013  |
| GO biological process | GO:2000177 | 3  | 79   | 0.0013  |
| GO biological process | GO:0008283 | 6  | 676  | 0.0014  |
| GO biological process | GO:0044093 | 9  | 1713 | 0.0014  |
| GO biological process | GO:0051952 | 3  | 82   | 0.0014  |
| GO biological process | GO:1901615 | 5  | 420  | 0.0014  |
| GO biological process | GO:2001023 | 3  | 83   | 0.0014  |
| GO biological process | GO:0001976 | 2  | 14   | 0.0015  |
| GO biological process | GO:0006919 | 3  | 85   | 0.0015  |
| GO biological process | GO:0007625 | 2  | 14   | 0.0015  |
| GO biological process | GO:0014854 | 2  | 14   | 0.0015  |
| GO biological process | GO:0019372 | 2  | 14   | 0.0015  |
| GO biological process | GO:0034220 | 7  | 995  | 0.0015  |
| GO biological process | GO:0045986 | 2  | 14   | 0.0015  |

|                       |            |    |       |        |
|-----------------------|------------|----|-------|--------|
| GO biological process | GO:0051967 | 2  | 14    | 0.0015 |
| GO biological process | GO:0060134 | 2  | 14    | 0.0015 |
| GO biological process | GO:0002029 | 2  | 15    | 0.0016 |
| GO biological process | GO:1902531 | 9  | 1764  | 0.0016 |
| GO biological process | GO:0043085 | 8  | 1381  | 0.0017 |
| GO biological process | GO:0043266 | 3  | 92    | 0.0017 |
| GO biological process | GO:0051704 | 10 | 2222  | 0.0017 |
| GO biological process | GO:0031667 | 5  | 455   | 0.0018 |
| GO biological process | GO:0048771 | 3  | 94    | 0.0018 |
| GO biological process | GO:0021756 | 2  | 17    | 0.0019 |
| GO biological process | GO:0050790 | 10 | 2249  | 0.0019 |
| GO biological process | GO:0006950 | 12 | 3267  | 0.002  |
| GO biological process | GO:0048511 | 4  | 250   | 0.002  |
| GO biological process | GO:0003085 | 2  | 18    | 0.0021 |
| GO biological process | GO:0006690 | 3  | 99    | 0.0021 |
| GO biological process | GO:0031329 | 6  | 743   | 0.0021 |
| GO biological process | GO:0050794 | 22 | 10484 | 0.0021 |
| GO biological process | GO:0030220 | 2  | 19    | 0.0022 |
| GO biological process | GO:2000178 | 2  | 19    | 0.0022 |
| GO biological process | GO:0019953 | 6  | 764   | 0.0023 |
| GO biological process | GO:0046883 | 4  | 261   | 0.0023 |
| GO biological process | GO:0060341 | 6  | 766   | 0.0023 |
| GO biological process | GO:0042053 | 2  | 20    | 0.0024 |
| GO biological process | GO:0035637 | 3  | 110   | 0.0026 |
| GO biological process | GO:0060444 | 2  | 21    | 0.0026 |
| GO biological process | GO:0045859 | 6  | 788   | 0.0027 |
| GO biological process | GO:0030728 | 2  | 22    | 0.0028 |
| GO biological process | GO:0051968 | 2  | 22    | 0.0028 |
| GO biological process | GO:0098664 | 2  | 22    | 0.0028 |
| GO biological process | GO:0045860 | 5  | 517   | 0.003  |
| GO biological process | GO:0001764 | 3  | 118   | 0.0031 |
| GO biological process | GO:0001782 | 2  | 24    | 0.0033 |
| GO biological process | GO:0043010 | 4  | 292   | 0.0033 |
| GO biological process | GO:0045598 | 3  | 120   | 0.0033 |
| GO biological process | GO:0007190 | 2  | 25    | 0.0035 |
| GO biological process | GO:0032496 | 4  | 298   | 0.0035 |
| GO biological process | GO:0003231 | 3  | 125   | 0.0036 |
| GO biological process | GO:0007628 | 2  | 26    | 0.0037 |
| GO biological process | GO:0009611 | 5  | 547   | 0.0037 |
| GO biological process | GO:0055017 | 2  | 26    | 0.0037 |
| GO biological process | GO:0010575 | 2  | 27    | 0.0039 |
| GO biological process | GO:0042417 | 2  | 27    | 0.0039 |
| GO biological process | GO:1902692 | 2  | 27    | 0.0039 |
| GO biological process | GO:0006810 | 13 | 4130  | 0.004  |
| GO biological process | GO:0009887 | 6  | 865   | 0.004  |
| GO biological process | GO:0014059 | 2  | 28    | 0.004  |
| GO biological process | GO:0015718 | 3  | 131   | 0.004  |
| GO biological process | GO:0016572 | 2  | 28    | 0.004  |
| GO biological process | GO:0043401 | 3  | 131   | 0.004  |
| GO biological process | GO:0048584 | 9  | 2054  | 0.004  |
| GO biological process | GO:0050873 | 2  | 28    | 0.004  |



|                       |            |    |       |        |
|-----------------------|------------|----|-------|--------|
| GO biological process | GO:0071549 | 2  | 28    | 0.004  |
| GO biological process | GO:1904064 | 3  | 131   | 0.004  |
| GO biological process | GO:0006693 | 2  | 29    | 0.0042 |
| GO biological process | GO:0007612 | 3  | 137   | 0.0042 |
| GO biological process | GO:0007623 | 3  | 137   | 0.0042 |
| GO biological process | GO:0009987 | 25 | 14652 | 0.0042 |
| GO biological process | GO:0010941 | 8  | 1638  | 0.0042 |
| GO biological process | GO:0015721 | 2  | 29    | 0.0042 |
| GO biological process | GO:0033135 | 3  | 136   | 0.0042 |
| GO biological process | GO:0045834 | 3  | 135   | 0.0042 |
| GO biological process | GO:0051336 | 7  | 1238  | 0.0042 |
| GO biological process | GO:0071470 | 2  | 29    | 0.0042 |
| GO biological process | GO:0001662 | 2  | 30    | 0.0043 |
| GO biological process | GO:0007202 | 2  | 30    | 0.0043 |
| GO biological process | GO:0009746 | 3  | 138   | 0.0043 |
| GO biological process | GO:0010613 | 2  | 30    | 0.0043 |
| GO biological process | GO:0033280 | 2  | 30    | 0.0043 |
| GO biological process | GO:1901701 | 6  | 896   | 0.0044 |
| GO biological process | GO:0001893 | 2  | 31    | 0.0045 |
| GO biological process | GO:0001975 | 2  | 31    | 0.0045 |
| GO biological process | GO:0008277 | 3  | 142   | 0.0045 |
| GO biological process | GO:0019228 | 2  | 31    | 0.0045 |
| GO biological process | GO:0042311 | 2  | 31    | 0.0045 |
| GO biological process | GO:0062012 | 4  | 332   | 0.0045 |
| GO biological process | GO:0045745 | 2  | 32    | 0.0047 |
| GO biological process | GO:0051482 | 2  | 32    | 0.0047 |
| GO biological process | GO:0002520 | 5  | 601   | 0.0048 |
| GO biological process | GO:0007618 | 2  | 33    | 0.0049 |
| GO biological process | GO:0010212 | 3  | 149   | 0.0049 |
| GO biological process | GO:0032228 | 2  | 33    | 0.0049 |
| GO biological process | GO:0034105 | 2  | 33    | 0.0049 |
| GO biological process | GO:0043065 | 5  | 604   | 0.0049 |
| GO biological process | GO:0051094 | 7  | 1286  | 0.0049 |
| GO biological process | GO:0051590 | 2  | 33    | 0.0049 |
| GO biological process | GO:0071312 | 2  | 33    | 0.0049 |
| GO biological process | GO:1901568 | 3  | 148   | 0.0049 |
| GO biological process | GO:0014074 | 3  | 151   | 0.0051 |
| GO biological process | GO:0035239 | 5  | 615   | 0.0052 |
| GO biological process | GO:0003006 | 5  | 622   | 0.0053 |
| GO biological process | GO:0030501 | 2  | 35    | 0.0053 |
| GO biological process | GO:0034405 | 2  | 35    | 0.0053 |
| GO biological process | GO:0048738 | 3  | 154   | 0.0053 |
| GO biological process | GO:0051223 | 5  | 622   | 0.0053 |
| GO biological process | GO:0009266 | 3  | 155   | 0.0054 |
| GO biological process | GO:0048519 | 14 | 4953  | 0.0054 |
| GO biological process | GO:0051098 | 4  | 356   | 0.0054 |
| GO biological process | GO:0051701 | 3  | 156   | 0.0054 |
| GO biological process | GO:0019048 | 2  | 36    | 0.0055 |
| GO biological process | GO:0032570 | 2  | 36    | 0.0055 |
| GO biological process | GO:0086004 | 2  | 36    | 0.0055 |
| GO biological process | GO:0006109 | 3  | 158   | 0.0056 |

|                       |            |    |      |        |
|-----------------------|------------|----|------|--------|
| GO biological process | GO:0097193 | 3  | 158  | 0.0056 |
| GO biological process | GO:0086091 | 2  | 37   | 0.0057 |
| GO biological process | GO:0021543 | 3  | 163  | 0.0059 |
| GO biological process | GO:0045935 | 8  | 1770 | 0.0059 |
| GO biological process | GO:0006928 | 7  | 1355 | 0.006  |
| GO biological process | GO:0048167 | 3  | 164  | 0.006  |
| GO biological process | GO:0007566 | 2  | 39   | 0.0061 |
| GO biological process | GO:0001763 | 3  | 169  | 0.0064 |
| GO biological process | GO:0046849 | 2  | 40   | 0.0064 |
| GO biological process | GO:0051281 | 2  | 40   | 0.0064 |
| GO biological process | GO:0051402 | 2  | 40   | 0.0064 |
| GO biological process | GO:0048514 | 4  | 381  | 0.0065 |
| GO biological process | GO:0048523 | 13 | 4454 | 0.0066 |
| GO biological process | GO:0050796 | 3  | 172  | 0.0066 |
| GO biological process | GO:0030522 | 3  | 173  | 0.0067 |
| GO biological process | GO:0010628 | 8  | 1826 | 0.0068 |
| GO biological process | GO:0042307 | 2  | 42   | 0.0068 |
| GO biological process | GO:0048583 | 12 | 3882 | 0.0068 |
| GO biological process | GO:0065009 | 11 | 3322 | 0.0068 |
| GO biological process | GO:0048678 | 2  | 43   | 0.007  |
| GO biological process | GO:0048732 | 4  | 395  | 0.007  |
| GO biological process | GO:1903170 | 2  | 43   | 0.007  |
| GO biological process | GO:0050679 | 3  | 178  | 0.0071 |
| GO biological process | GO:0031328 | 8  | 1846 | 0.0072 |
| GO biological process | GO:0050731 | 3  | 180  | 0.0072 |
| GO biological process | GO:0048699 | 7  | 1422 | 0.0073 |
| GO biological process | GO:0007268 | 4  | 402  | 0.0074 |
| GO biological process | GO:0008542 | 2  | 45   | 0.0074 |
| GO biological process | GO:0048608 | 4  | 405  | 0.0075 |
| GO biological process | GO:1901654 | 3  | 183  | 0.0075 |
| GO biological process | GO:0007626 | 3  | 184  | 0.0076 |
| GO biological process | GO:0051209 | 2  | 46   | 0.0076 |
| GO biological process | GO:2000026 | 8  | 1876 | 0.0077 |
| GO biological process | GO:0055010 | 2  | 48   | 0.0081 |
| GO biological process | GO:0097194 | 2  | 48   | 0.0081 |
| GO biological process | GO:1903727 | 2  | 48   | 0.0081 |
| GO biological process | GO:0001933 | 4  | 422  | 0.0084 |
| GO biological process | GO:0035094 | 2  | 49   | 0.0084 |
| GO biological process | GO:0050708 | 4  | 422  | 0.0084 |
| GO biological process | GO:0032989 | 5  | 720  | 0.0085 |
| GO biological process | GO:0048585 | 7  | 1483 | 0.0088 |
| GO biological process | GO:0032101 | 5  | 732  | 0.009  |
| GO biological process | GO:0050793 | 9  | 2416 | 0.0091 |
| GO biological process | GO:0030099 | 3  | 203  | 0.0094 |
| GO biological process | GO:0042981 | 7  | 1501 | 0.0094 |
| GO biological process | GO:0051241 | 6  | 1098 | 0.0094 |
| GO biological process | GO:0051345 | 5  | 742  | 0.0094 |
| GO biological process | GO:0060688 | 2  | 53   | 0.0094 |
| GO biological process | GO:0045944 | 6  | 1104 | 0.0095 |
| GO biological process | GO:2000027 | 3  | 207  | 0.0098 |
| GO biological process | GO:0007584 | 3  | 208  | 0.0099 |

|                       |            |    |      |        |
|-----------------------|------------|----|------|--------|
| GO biological process | GO:0030334 | 5  | 753  | 0.0099 |
| GO biological process | GO:0032922 | 2  | 55   | 0.0099 |
| GO biological process | GO:0030335 | 4  | 452  | 0.0101 |
| GO biological process | GO:0006725 | 13 | 4754 | 0.0104 |
| GO biological process | GO:0042130 | 2  | 57   | 0.0104 |
| GO biological process | GO:0045600 | 2  | 59   | 0.0109 |
| GO biological process | GO:0071242 | 2  | 60   | 0.0113 |
| GO biological process | GO:0009968 | 6  | 1160 | 0.0116 |
| GO biological process | GO:0071900 | 4  | 488  | 0.0128 |
| GO biological process | GO:0045926 | 3  | 235  | 0.013  |
| GO biological process | GO:0000904 | 4  | 498  | 0.0136 |
| GO biological process | GO:0007169 | 4  | 499  | 0.0136 |
| GO biological process | GO:0050795 | 2  | 68   | 0.0138 |
| GO biological process | GO:0048646 | 5  | 831  | 0.014  |
| GO biological process | GO:0040014 | 2  | 69   | 0.0141 |
| GO biological process | GO:0032409 | 3  | 246  | 0.0144 |
| GO biological process | GO:0008630 | 2  | 71   | 0.0147 |
| GO biological process | GO:1901360 | 13 | 4963 | 0.0147 |
| GO biological process | GO:0038127 | 2  | 72   | 0.015  |
| GO biological process | GO:0045786 | 4  | 517  | 0.015  |
| GO biological process | GO:0046889 | 2  | 73   | 0.0152 |
| GO biological process | GO:0030097 | 4  | 526  | 0.0158 |
| GO biological process | GO:0019233 | 2  | 75   | 0.0159 |
| GO biological process | GO:0021536 | 2  | 75   | 0.0159 |
| GO biological process | GO:0021766 | 2  | 75   | 0.0159 |
| GO biological process | GO:0032943 | 2  | 76   | 0.0162 |
| GO biological process | GO:0007416 | 2  | 77   | 0.0165 |
| GO biological process | GO:0042475 | 2  | 78   | 0.0169 |
| GO biological process | GO:0071260 | 2  | 78   | 0.0169 |
| GO biological process | GO:0007166 | 8  | 2198 | 0.0171 |
| GO biological process | GO:0055007 | 2  | 79   | 0.0172 |
| GO biological process | GO:0007399 | 8  | 2206 | 0.0175 |
| GO biological process | GO:0006869 | 3  | 272  | 0.0179 |
| GO biological process | GO:0090068 | 3  | 273  | 0.0181 |
| GO biological process | GO:0070542 | 2  | 82   | 0.0183 |
| GO biological process | GO:1901570 | 2  | 82   | 0.0183 |
| GO biological process | GO:0110110 | 2  | 83   | 0.0185 |
| GO biological process | GO:0045597 | 5  | 908  | 0.0187 |
| GO biological process | GO:0008585 | 2  | 84   | 0.0188 |
| GO biological process | GO:0009892 | 9  | 2762 | 0.0188 |
| GO biological process | GO:0048145 | 2  | 84   | 0.0188 |
| GO biological process | GO:0048640 | 2  | 84   | 0.0188 |
| GO biological process | GO:0007193 | 2  | 85   | 0.0191 |
| GO biological process | GO:0071158 | 2  | 85   | 0.0191 |
| GO biological process | GO:0098869 | 2  | 86   | 0.0194 |
| GO biological process | GO:0016032 | 4  | 571  | 0.0197 |
| GO biological process | GO:0010506 | 3  | 286  | 0.0198 |
| GO biological process | GO:0042133 | 2  | 87   | 0.0198 |
| GO biological process | GO:0032103 | 3  | 291  | 0.0206 |
| GO biological process | GO:0006631 | 3  | 294  | 0.021  |
| GO biological process | GO:0021782 | 2  | 91   | 0.0211 |

|                       |            |   |      |        |
|-----------------------|------------|---|------|--------|
| GO biological process | GO:0001655 | 3 | 299  | 0.0219 |
| GO biological process | GO:0060548 | 5 | 953  | 0.0219 |
| GO biological process | GO:0007631 | 2 | 94   | 0.0222 |
| GO biological process | GO:2000379 | 2 | 94   | 0.0222 |
| GO biological process | GO:0048638 | 3 | 302  | 0.0223 |
| GO biological process | GO:0022603 | 5 | 961  | 0.0224 |
| GO biological process | GO:0043112 | 2 | 95   | 0.0225 |
| GO biological process | GO:0046677 | 3 | 305  | 0.0228 |
| GO biological process | GO:0022607 | 8 | 2343 | 0.0232 |
| GO biological process | GO:0051260 | 3 | 312  | 0.0241 |
| GO biological process | GO:0006606 | 2 | 101  | 0.0251 |
| GO biological process | GO:0032411 | 2 | 101  | 0.0251 |
| GO biological process | GO:0002262 | 2 | 102  | 0.0254 |
| GO biological process | GO:0032091 | 2 | 102  | 0.0254 |
| GO biological process | GO:0007276 | 4 | 632  | 0.0263 |
| GO biological process | GO:0032526 | 2 | 104  | 0.0263 |
| GO biological process | GO:0042770 | 2 | 104  | 0.0263 |
| GO biological process | GO:0033138 | 2 | 105  | 0.0265 |
| GO biological process | GO:0032269 | 5 | 1014 | 0.0271 |
| GO biological process | GO:0003014 | 2 | 107  | 0.0273 |
| GO biological process | GO:0051781 | 2 | 107  | 0.0273 |
| GO biological process | GO:0008203 | 2 | 109  | 0.0281 |
| GO biological process | GO:0030855 | 4 | 649  | 0.0284 |
| GO biological process | GO:0033365 | 4 | 649  | 0.0284 |
| GO biological process | GO:0032970 | 3 | 338  | 0.0289 |
| GO biological process | GO:0048589 | 3 | 340  | 0.0292 |
| GO biological process | GO:0071902 | 3 | 340  | 0.0292 |
| GO biological process | GO:0031324 | 8 | 2463 | 0.0297 |
| GO biological process | GO:0031331 | 3 | 343  | 0.0297 |
| GO biological process | GO:0040008 | 4 | 663  | 0.03   |
| GO biological process | GO:0032147 | 3 | 347  | 0.0304 |
| GO biological process | GO:0050864 | 2 | 118  | 0.0317 |
| GO biological process | GO:1903532 | 3 | 364  | 0.0341 |
| GO biological process | GO:0051222 | 3 | 365  | 0.0343 |
| GO biological process | GO:0022407 | 3 | 366  | 0.0345 |
| GO biological process | GO:0030326 | 2 | 126  | 0.0354 |
| GO biological process | GO:0010605 | 8 | 2558 | 0.0358 |
| GO biological process | GO:0006979 | 3 | 373  | 0.0359 |
| GO biological process | GO:0062013 | 2 | 129  | 0.0365 |
| GO biological process | GO:0035304 | 2 | 130  | 0.037  |
| GO biological process | GO:1905330 | 2 | 130  | 0.037  |
| GO biological process | GO:0044092 | 5 | 1119 | 0.0379 |
| GO biological process | GO:0009749 | 2 | 133  | 0.0385 |
| GO biological process | GO:0001819 | 3 | 390  | 0.0399 |
| GO biological process | GO:0050777 | 2 | 136  | 0.0399 |
| GO biological process | GO:0051254 | 6 | 1596 | 0.0406 |
| GO biological process | GO:0040011 | 5 | 1144 | 0.0408 |
| GO biological process | GO:0046683 | 2 | 138  | 0.0408 |
| GO biological process | GO:0072594 | 3 | 396  | 0.0412 |
| GO biological process | GO:1902107 | 2 | 139  | 0.0412 |
| GO biological process | GO:0009888 | 6 | 1626 | 0.0437 |

|                       |            |    |      |          |
|-----------------------|------------|----|------|----------|
| GO biological process | GO:0045931 | 2  | 144  | 0.0438   |
| GO biological process | GO:0006629 | 5  | 1192 | 0.0473   |
| GO biological process | GO:2001257 | 2  | 152  | 0.0479   |
| GO biological process | GO:0007093 | 2  | 153  | 0.0485   |
| GO biological process | GO:0002683 | 3  | 425  | 0.0487   |
| GO biological process | GO:0008152 | 18 | 9569 | 0.0487   |
| GO biological process | GO:0001894 | 2  | 155  | 0.0493   |
| KEGG pathway          | hsa04726   | 9  | 112  | 2.65E-12 |
| KEGG pathway          | hsa04020   | 9  | 179  | 7.44E-11 |
| KEGG pathway          | hsa04261   | 8  | 139  | 3.92E-10 |
| KEGG pathway          | hsa04080   | 8  | 272  | 5.04E-08 |
| KEGG pathway          | hsa04270   | 6  | 119  | 2.80E-07 |
| KEGG pathway          | hsa04022   | 6  | 160  | 1.27E-06 |
| KEGG pathway          | hsa04970   | 5  | 86   | 1.99E-06 |
| KEGG pathway          | hsa05222   | 5  | 92   | 2.40E-06 |
| KEGG pathway          | hsa04024   | 6  | 195  | 2.64E-06 |
| KEGG pathway          | hsa05161   | 5  | 142  | 1.53E-05 |
| KEGG pathway          | hsa05223   | 4  | 66   | 2.37E-05 |
| KEGG pathway          | hsa05200   | 7  | 515  | 3.53E-05 |
| KEGG pathway          | hsa05210   | 4  | 85   | 5.26E-05 |
| KEGG pathway          | hsa04540   | 4  | 87   | 5.33E-05 |
| KEGG pathway          | hsa04933   | 4  | 98   | 7.84E-05 |
| KEGG pathway          | hsa04215   | 3  | 31   | 9.76E-05 |
| KEGG pathway          | hsa04919   | 4  | 115  | 0.00013  |
| KEGG pathway          | hsa04728   | 4  | 128  | 0.00018  |
| KEGG pathway          | hsa04010   | 5  | 293  | 0.00025  |
| KEGG pathway          | hsa05012   | 4  | 142  | 0.00025  |
| KEGG pathway          | hsa04723   | 4  | 148  | 0.00027  |
| KEGG pathway          | hsa04921   | 4  | 149  | 0.00027  |
| KEGG pathway          | hsa04932   | 4  | 149  | 0.00027  |
| KEGG pathway          | hsa05014   | 3  | 50   | 0.00027  |
| KEGG pathway          | hsa04923   | 3  | 53   | 0.00028  |
| KEGG pathway          | hsa05010   | 4  | 168  | 0.00035  |
| KEGG pathway          | hsa04370   | 3  | 59   | 0.00036  |
| KEGG pathway          | hsa05152   | 4  | 172  | 0.00036  |
| KEGG pathway          | hsa04924   | 3  | 63   | 0.0004   |
| KEGG pathway          | hsa05031   | 3  | 65   | 0.00042  |
| KEGG pathway          | hsa05167   | 4  | 183  | 0.00042  |
| KEGG pathway          | hsa04115   | 3  | 68   | 0.00045  |
| KEGG pathway          | hsa01524   | 3  | 70   | 0.00048  |
| KEGG pathway          | hsa05212   | 3  | 74   | 0.00054  |
| KEGG pathway          | hsa05410   | 3  | 81   | 0.00068  |
| KEGG pathway          | hsa04911   | 3  | 84   | 0.00074  |
| KEGG pathway          | hsa04727   | 3  | 88   | 0.00082  |
| KEGG pathway          | hsa04912   | 3  | 88   | 0.00082  |
| KEGG pathway          | hsa05414   | 3  | 88   | 0.00082  |
| KEGG pathway          | hsa04925   | 3  | 93   | 0.00089  |
| KEGG pathway          | hsa05146   | 3  | 94   | 0.00089  |
| KEGG pathway          | hsa05145   | 3  | 109  | 0.0013   |
| KEGG pathway          | hsa04725   | 3  | 111  | 0.0014   |
| KEGG pathway          | hsa04210   | 3  | 135  | 0.0023   |

|              |          |   |     |        |
|--------------|----------|---|-----|--------|
| KEGG pathway | hsa05206 | 3 | 149 | 0.0029 |
| KEGG pathway | hsa05226 | 3 | 147 | 0.0029 |
| KEGG pathway | hsa04960 | 2 | 37  | 0.0035 |
| KEGG pathway | hsa05216 | 2 | 37  | 0.0035 |
| KEGG pathway | hsa05225 | 3 | 163 | 0.0036 |
| KEGG pathway | hsa05016 | 3 | 193 | 0.0056 |
| KEGG pathway | hsa05030 | 2 | 49  | 0.0056 |
| KEGG pathway | hsa05205 | 3 | 195 | 0.0056 |
| KEGG pathway | hsa05134 | 2 | 54  | 0.0064 |
| KEGG pathway | hsa05416 | 2 | 56  | 0.0067 |
| KEGG pathway | hsa05213 | 2 | 58  | 0.007  |
| KEGG pathway | hsa00590 | 2 | 61  | 0.0076 |
| KEGG pathway | hsa04927 | 2 | 63  | 0.0079 |
| KEGG pathway | hsa04720 | 2 | 64  | 0.008  |
| KEGG pathway | hsa05214 | 2 | 68  | 0.0089 |
| KEGG pathway | hsa05140 | 2 | 70  | 0.0092 |
| KEGG pathway | hsa05412 | 2 | 72  | 0.0096 |
| KEGG pathway | hsa04260 | 2 | 76  | 0.0104 |
| KEGG pathway | hsa05220 | 2 | 76  | 0.0104 |
| KEGG pathway | hsa01521 | 2 | 78  | 0.0106 |
| KEGG pathway | hsa04742 | 2 | 81  | 0.0112 |
| KEGG pathway | hsa05032 | 2 | 91  | 0.0138 |
| KEGG pathway | hsa04657 | 2 | 92  | 0.0139 |
| KEGG pathway | hsa04713 | 2 | 93  | 0.0139 |
| KEGG pathway | hsa04750 | 2 | 92  | 0.0139 |
| KEGG pathway | hsa04659 | 2 | 102 | 0.0159 |
| KEGG pathway | hsa05165 | 3 | 317 | 0.0159 |
| KEGG pathway | hsa04668 | 2 | 108 | 0.0175 |
| KEGG pathway | hsa04724 | 2 | 112 | 0.0185 |
| KEGG pathway | hsa04071 | 2 | 116 | 0.0193 |
| KEGG pathway | hsa04151 | 3 | 348 | 0.0193 |
| KEGG pathway | hsa04650 | 2 | 124 | 0.0215 |
| KEGG pathway | hsa04926 | 2 | 130 | 0.0232 |
| KEGG pathway | hsa04915 | 2 | 133 | 0.0239 |
| KEGG pathway | hsa05034 | 2 | 142 | 0.0266 |
| KEGG pathway | hsa05224 | 2 | 147 | 0.0281 |
| KEGG pathway | hsa04934 | 2 | 153 | 0.0299 |
| KEGG pathway | hsa05164 | 2 | 168 | 0.0351 |
| KEGG pathway | hsa05202 | 2 | 169 | 0.0351 |
| KEGG pathway | hsa05203 | 2 | 183 | 0.0401 |
| KEGG pathway | hsa04015 | 2 | 203 | 0.0479 |
